1 [Alternative splicing changes are associated with pre-birth adaptation during lung](#)  
2 [development](#)

3

4 Marta F. Fidalgo<sup>1</sup>, Catarina G. Fonseca<sup>1</sup>, Paulo Caldas<sup>2</sup>, Alexandre A. S. F. Raposo<sup>1</sup>, Tania  
5 Balboni<sup>3</sup>, Ana R. Grosso<sup>2</sup>, Francisca F. Vasconcelos<sup>1,5,6</sup>, Cláudio A. Franco<sup>1,4,5,6</sup>

6

7 <sup>1</sup> Instituto de Medicina Molecular João Lobo Antunes, Faculdade de Medicina, Universidade  
8 de Lisboa, 1649-028 Lisboa, Portugal

9 <sup>2</sup> UCIBIO – Applied Molecular Biosciences Unit, Department of Life Sciences, NOVA School of  
10 Science and Technology, NOVA University Lisbon, 2819-516 Caparica, Portugal

11 <sup>3</sup> Department of Experimental, Diagnostic and Specialty Medicine, University of Bologna,  
12 Bologna, Italy

13 <sup>4</sup> Instituto de Histologia e Biologia do Desenvolvimento, Faculdade de Medicina,  
14 Universidade de Lisboa, 1649-028 Lisboa, Portugal

15 <sup>5</sup> Co-last authors

16 <sup>6</sup> Co-corresponding authors: [fvasconcelos@medicina.ulisboa.pt](mailto:fvasconcelos@medicina.ulisboa.pt);

17 [cfranco@medicina.ulisboa.pt](mailto:cfranco@medicina.ulisboa.pt)

18

19

20

## 21 Abstract

22 Gas exchanges are ensured by lung alveoli, which are mainly composed by epithelial  
23 alveolar type 1 (AT1), alveolar type 2 (AT2) and capillary endothelial cells (ECs).  
24 Alveologenesi s starts during late embryonic development and continues after birth and  
25 relies on extensive biochemical crosstalk between these cell types. How this crosstalk is  
26 modulated to anticipate and accommodate the radical changes occurring at birth is still  
27 unclear.

28 We investigated the alternative splicing (AS) changes occurring during lung development  
29 at the embryonic to postnatal transition by performing RNAseq of mouse lungs at distinct  
30 developmental stages. We found that most of the AS changes occur at the embryonic to  
31 postnatal transition. In addition, we identified hnRNP A1, Cpeb4 and Elavl2/HuB as  
32 putative splicing regulators of this transition. We show that the AS of a major pro-  
33 angiogenic chemokine, vascular endothelial growth factor A (VEGFA), is differentially  
34 regulated at this transition. Remarkably, we found that there is a switch from the  
35 predominance of *Vegfa 164* to *Vegfa 188* just before birth specifically in AT1 cells, whilst  
36 in other cell populations *Vegfa* does not undergo AS changes. Moreover, we identified a  
37 novel *Vegfa* isoform generated by the retention of intron 5, *Vegfa i5*.

38 Our results reveal a cell type-specific regulation of *Vegfa* AS that may constitute a pre-  
39 birth adaptation mechanism of the epithelial-endothelial crosstalk, which may be  
40 fundamental for the adaptation to breathing and may have implications for pathological  
41 conditions.

42 **Keywords** - Lung development, alternative splicing, vascular endothelial growth factor A,  
43 endothelial cells, alveolar epithelial cells

## 44 Introduction

45 Respiration, the process of gas exchanges between the body and the environment, takes  
46 place at alveoli in the lung. The efficiency of gas exchanges is ensured by the functional  
47 specialization of the numerous cell types that compose the alveolus, including: epithelial  
48 alveolar type 1 (AT1) cells, thin and elongated cells that line the surface of each alveolus;  
49 epithelial alveolar type 2 (AT2) cells, which are sparsely distributed at the alveolar surface and  
50 secrete surfactant essential for alveolar inflation and deflation; and endothelial cells (ECs),  
51 which compose the interior surface of capillaries that tightly enwrap the alveolar epithelial  
52 layer, and promote gas exchanges with blood<sup>1,2</sup>.

53 Alveologenesis starts during late embryonic development at E16.5 in mouse and continues  
54 for 3-8 weeks after birth. New alveoli form through branching morphogenesis and  
55 angiogenesis by coordinated growth and specialization of epithelial and endothelial cells,  
56 respectively<sup>2,3</sup>. The crosstalk between these cell types is mediated by multiple signalling  
57 pathways, such as VEGFA, WNT, FGF and HIPPO<sup>3-6</sup>. For instance, secretion of VEGFA by  
58 epithelial cells during lung development regulates the expansion of the vascular network by  
59 binding to VEGF receptor 2 (VEGFR2) at the surface of ECs and triggering angiogenesis.  
60 Genetic deletion or pharmacological inhibition of VEGFA compromises lung alveolar epithelial  
61 development and capillary growth, leading to bronchopulmonary dysplasia, characterized by  
62 simplified alveoli and dysmorphic vasculature<sup>7-9</sup>. Despite extensive research on lung  
63 development, how the communication between these cell types is modulated at the critical  
64 transition between embryonic to postnatal development is not fully understood.

65 Transcriptional and alternative splicing (AS) changes have previously been implicated in the  
66 regulation of multiple developmental processes<sup>10-13</sup>. Previously published RNAseq and  
67 single-cell RNAseq studies from lungs at different developmental stages have enabled the

68 comprehensive characterization of cell populations and the detailed study of gene expression  
69 changes occurring during lung development<sup>8,14,15</sup>. Yet, due to the lack of sequencing depth,  
70 none of these approaches has allowed the study of AS, and thus, the knowledge regarding AS  
71 during lung development is limited. One of the few genes shown to undergo AS changes  
72 during lung development was *Vegfa*<sup>16–18</sup>. *Vegfa* is composed of 8 exons and the most  
73 common *Vegfa* isoforms differ on the inclusion or exclusion of exons 6 and 7: *Vegfa 188*  
74 contains all eight *Vegfa* exons, *Vegfa 164* does not contain exon 6 and *Vegfa 120* does not  
75 contain exons 6 and 7. *Vegfa* isoforms are functionally distinct in terms of binding to the  
76 extracellular matrix, and in their potential to induce angiogenesis, EC proliferation, survival  
77 and vascular permeability<sup>19–22</sup>. In addition, it has been shown that the relative proportion  
78 between *Vegfa 120*, *164* and *188* isoforms changes during lung development<sup>16–18</sup> and that  
79 loss of specific isoforms has a functional impact. Mice expressing exclusively *Vegfa 120*  
80 showed impaired lung development, whilst mice expressing exclusively *Vegfa 164* or *Vegfa*  
81 *188* isoforms have no gross morphological defects<sup>23,24</sup>. Despite the relevance of *Vegfa* AS  
82 during lung development, the temporal dynamics and cell-specific expression of *Vegfa*  
83 isoforms along lung development remain poorly defined.

84 Here, we performed an unbiased genome-wide analysis of AS at embryonic and early  
85 postnatal stages of lung development and we identified that most of the AS changes occur at  
86 the transition from the pre- to postnatal life, suggesting that AS regulation may be associated  
87 with lung adaptation to birth. We validated our genome-wide analysis by focusing on *Vegfa*  
88 isoforms and we identified a cell type-specific switch in AS of *Vegfa* during lung  
89 alveologensis.

90

91 Results

92 **Genome-wide analysis reveals that AS changes occur at the transition from the pre- to post-**  
93 **natal period**

94 To analyze the genome-wide AS changes occurring during lung development, we extracted  
95 and sequenced mRNA of whole mouse lungs at two embryonic (E15.5 and E18.5) and two  
96 postnatal (P5 and P8) stages (**Figure 1A**). We performed 101 nucleotides (nt) paired-end  
97 RNAseq with triplicate samples and obtained an average of 59.8 million reads per sample  
98 (**Figure S1A**).

99 To assess the quality of our datasets, we analysed the expression of a set of known lineage-  
100 specific markers (**Figure S1B**). In accordance with what has been shown before <sup>25,26</sup>, our data  
101 shows that the epithelial progenitor marker Sox9 progressively decreases, while markers for  
102 AT1 (Aqp5, Pdpn) and AT2 (Sfptc, Sfptd) epithelial cells increase over the same developmental  
103 period. Also, the levels of EC-specific markers - Sox17, Pecam1 and Cdh5 - increase during  
104 development, as the lung progressively becomes more enriched in blood vessels. In addition,  
105 Car4 expression increases from E18.5 to P5, concordant with previous findings showing that  
106 Car4-positive ECs, a specialized type of alveolar capillary ECs (aCap), is specified just before  
107 birth at E19.5 <sup>8</sup>. It has also been shown that, after birth, the immune cells repertoire that  
108 populates the lungs undergoes profound changes: Embryonic macrophages (Ncapd2-positive)  
109 are eliminated and postnatal lungs become enriched in T lymphocytes (Cd3e-positive),  
110 neutrophils (Retnig-positive) and several subtypes of macrophages (Itgax-, C1qa-, Plac8-  
111 positive) <sup>27</sup>. Concordantly, in our datasets, the expression of Ncapd2 decreases at birth, while  
112 the expression of all these other immune cell markers increases at birth. Thus, this analysis  
113 supports that the obtained RNAseq datasets are of good quality.

114 To identify AS events that change during lung development, we used the Vertebrate AS  
115 database (VastDB) and Vertebrate AS Transcription Tools (VAST-TOOLS)<sup>28,29</sup>. We evaluated  
116 differential alternative splicing (DAS) between each pair of the above-mentioned perinatal  
117 time-points. We obtained 460 DAS events associated with 355 genes (**Table S1**) that showed  
118 a statistically significant variation in at least one of the pairwise comparisons ( $|\Delta\text{PSI}| \geq 10\%$ ,  
119 confidence interval of 95%). Since variations in gene expression levels can affect the accuracy  
120 with which AS can be detected and quantified<sup>30</sup>, we excluded from subsequent analysis all  
121 AS events associated with genes that undergo statistically significant changes in gene  
122 expression ( $\log_2\text{FC} > 1$  and  $\text{FDR} < 0.05$ ) in the same pairwise comparison (**Table S2**). From this  
123 filtering, we obtained 371 DAS events associated with 295 genes (**Table S3**). Remarkably, only  
124 a minority of genes associated with DAS events undergoes changes in gene expression in the  
125 same comparison (**Figure S1C**). In addition, we found that most of the genes that undergo  
126 DAS are expressed at high levels (80%), as compared to the distribution of all expressed genes  
127 (~50%) (**Figure S1D**). Thus, these results suggest that the majority of alterations in AS are  
128 independent of changes in gene expression levels of those same genes.

129 Next, we explored the dynamics of DAS during lung development. We performed K-means  
130 clustering of DAS events that occur in non-differentially expressed genes (**Figure 1B**),  
131 specifying the optimal number of clusters to 2, as determined by the average silhouette width  
132 method (**Figure S1E**). Remarkably, clustering of AS events segregated them between  
133 embryonic and postnatal stages. Cluster 1 contains AS events whose percent spliced in (PSI)  
134 values decrease postnatally; and cluster 2 contains AS events whose PSI values increase  
135 postnatally (**Figure 1B-C, Table S5**), with the majority of the AS changes detected occurring  
136 between E18.5 and P5. A complementary analysis using hierarchical clustering of these DAS  
137 events identifies this same trend (**Figure S1F**). This result suggests that adaptation to

138 breathing (embryonic-to-postnatal transition) may involve a comprehensive program of AS  
139 changes on a large number of genes, which might fine-tune their activity independent of gene  
140 expression.

141 To understand which pathways are associated with changes in AS during the embryonic-to-  
142 postnatal transition, we performed KEGG pathway analysis on the DAS events occurring in  
143 non-differentially expressed genes. Enriched terms reveal that AS occurs in genes that are  
144 associated with adherens junctions (such as *Afdn*, *Ctnnd1* and *Baiap2*), tight junctions (such  
145 as *Magi1*, *Patj* and *Amotl1*), and HIPPO signaling pathway (such as *Yap1*, *Tead1* and *Llgl2*)  
146 **(Figure 1D and Table S6)**. In sum, our results show that significant AS changes occur in the  
147 developing mouse lung during the embryonic-to-postnatal transition, between E18.5 and P5.  
148 These changes occur in genes involved in cell-cell adhesion complexes and a signaling  
149 pathway known to mediate intercellular communication during lung development.

150

#### 151 **In silico analysis identifies RBP candidates for regulation of AS during lung development**

152 The fact that most DAS occur between E18.5 and P5 suggests that these AS events may be  
153 regulated by a common regulatory mechanism. AS changes are often driven by changes in the  
154 levels of RNA binding proteins (RBPs)<sup>31</sup> Thus, we sought to identify RBPs that could regulate  
155 the AS changes in lungs. We searched for motif enrichment/depletion on DAS events between  
156 E18.5 and P5 occurring in non-differentially expressed genes. We tested 250 nt sequences  
157 flanking the splice sites of all regulated splicing events (intronic and exonic) against all RNA-  
158 binding proteins in the CISBP-RNA database<sup>32</sup> using Matt<sup>33</sup>. For exon skipping events, we  
159 found a significant result (either enrichment or depletion) for 49 motifs, corresponding to 39  
160 RBPs, while for intron retention events we found 64 motifs corresponding to 45 RBPs **(Figure**  
161 **2A and Table S7)**. We then focused on RBPs that change their expression during development,

162 as it has been shown that these could drive the inclusion/skipping of AS events <sup>11</sup>. Thus, from  
163 the 363 mouse RBPs listed on the CISBP-RNA database, we filtered those that undergo  
164 differential gene expression between E18.5 and P5. We identified 47 RBPs fulfilling this  
165 condition, 11 of which increased in expression and 36 decreased in expression from E18.5 to  
166 P5 (**Figure 2B, Table S8**). Remarkably, only 3 out of 47 RBPs exhibit both a significant  
167 enrichment of their motifs and differential gene expression between E18.5 and P5: *Hnrnpa1*  
168 (downregulated), *Cpeb4* (upregulated) and *Elavl2* (downregulated) (**Figure 2C, Table S9**). Our  
169 results show that included exons have more motifs for the upregulated *Cpeb4* and for the  
170 downregulated *Elavl2*, while retained introns have more motifs for the downregulated  
171 *Hnrnpa1* (**Figure S2A**). Of note, we could validate the binding of hnRNP A1 to OGT intron 4  
172 and its conservation in human cells using CLIP-seq profiles (**Figure S2B**), supporting the  
173 possibility that the binding events identified may indeed occur in cells. These results position  
174 *Cpeb4*, *Elavl2*/HuB and hnRNP A1 as strong candidate RBPs for the regulation of the exon  
175 skipping and intron retention events detected in the mouse lungs on the embryonic to  
176 postnatal transition. Next, we re-analyzed the AS events that are associated with differentially  
177 expressed genes and searched for AS events enriched in *Cpeb4*, *Elavl2*/HuB and hnRNP A1  
178 binding motifs. Out of 89 AS events, associated with 59 genes, we identified 21 AS events  
179 containing one or more of these binding motifs (**Table S10**), including genes such as *Abr*, *Aspn*  
180 and *Vegfa*, which have been previously associated with lung development and/or pathology  
181 <sup>7,8,34,35</sup>. In conclusion, we found a comprehensive and specific AS signature and potential AS  
182 regulators involved in the embryonic to postnatal transition.

183

184

185



186 **Analysis of AS identifies a novel *Vegfa* isoform containing intron 5**

187 Next, to further dissect DAS relevant for the transition between embryonic and post-natal  
188 time-points, we focused on *Vegfa*, since it is essential for lung development <sup>7,8</sup> by regulating  
189 blood vessel formation <sup>36</sup>. Visual inspection of *Vegfa* RNAseq profile revealed the increased  
190 inclusion of *Vegfa* exon 6 and of intron 5 into processed mRNA transcripts from embryonic to  
191 postnatal time-points (**Figure 3A**). While AS of *Vegfa* exon 6 has been previously described <sup>22</sup>,  
192 the inclusion of intron 5 in *Vegfa* mature mRNA species has never been reported before. Thus,  
193 we characterized in more detail the existence of intron 5-containing isoforms. To identify  
194 which *Vegfa* isoform(s) contain(s) intron 5, we analysed RNA extracted from lungs at P5, a  
195 stage at which intron 5 retention was evident (**Figure 3A**). Specifically, from these RNA  
196 samples, we produced cDNA and performed end-point PCR amplification of the intron 5-  
197 containing cDNA molecules. For that, we used primer pairs in which one primer anneals with  
198 intron 5 and the other anneals with the 5'UTR/exon 1 or with 3'UTR (**Figure 3B**). The size of  
199 the resulting PCR products and the fact that only one band per PCR reaction was obtained  
200 (**Figure 3C**), suggested that the *Vegfa* isoform containing intron 5 also contains all *Vegfa* exons  
201 from 1 to 8. We named this isoform *Vegfa i5*. The sequence of this newly identified isoform  
202 was further confirmed by Sanger sequencing of the amplified PCR products (**Figure 3B**,  
203 **bottom panel**).

204 Interestingly, we predicted motif hits for all RBPs in the Catalog of Inferred Sequence Binding  
205 Preferences (CISBP-RNA) database along the *Vegfa* intron 5 sequence and found 19 matches  
206 that correspond to differentially expressed genes through development (**Table S11**). These  
207 include the RBPs above identified as candidate regulators of the AS changes, Elavl2/HuB,  
208 Cpeb4 and hnRNP A1, suggesting that these may also regulate *Vegfa i5* during mouse lung

209 development. These results revealed a previously unidentified *Vegfa* isoform to be expressed  
210 during lung development.

211

### 212 ***Vegfa* isoforms expression changes during lung development**

213 To further identify which *Vegfa* isoforms, in addition to *Vegfa i5*, are expressed during lung  
214 development, we analysed the expression changes of the *Vegfa* isoforms previously  
215 annotated in ENSEMBL using Kallisto <sup>37</sup>. Moreover, we manually annotated the newly  
216 identified *Vegfa i5* isoform on Kallisto index. Of the annotated isoforms, we found that *Vegfa*  
217 *120*, *164*, *188* and *i5* are expressed during lung development and that all these isoforms  
218 increase in expression from embryonic to postnatal time-points (**Figure 4A**). This increase is  
219 concordant with the increase in total *Vegfa* expression levels in RNAseq during the perinatal  
220 period, from E18.5 to P5 (**Figure S3A**). Remarkably, the isoforms showing the most prominent  
221 increase are the ones containing exon 6: *Vegfa 188* and *i5* (absolute fold change from E18.5  
222 to P5 of 7.06 and 4.18, respectively) (**Figure 4A**). Concordantly, the *Vegfa* Vast DB AS event  
223 undergoing changes is the inclusion of exon 6 (**Figure 3B**).

224 To characterize the temporal dynamics of AS of *Vegfa* with higher resolution, we collected  
225 lungs at E15.5, E17.5, E18.5, E19.5, P0, P5 and P8, as well as two later time-points: P21, at  
226 which alveologenesis is still occurring, and adult, at which alveologenesis has already ceased  
227 (**Figure 4B**). The analysis of the expression dynamics of each *Vegfa* isoform at different  
228 developmental stages was performed by RT-qPCR. For that, we designed primer pairs that  
229 specifically amplify each of the isoforms (**Figure 4C**). In addition, we designed a pair of primers  
230 that amplifies all *Vegfa* isoforms (**Figure 4C**, primers F2 and R2). The specificity of these primer  
231 pairs on the RT-qPCR was validated by the amplification of a single PCR product of the

232 predicted size for each isoform (**Figure S3C**). This result also excluded the eventual occurrence  
233 of spurious amplification of genomic DNA.

234 In accordance with the RNAseq results, RT-qPCR analysis revealed a progressive increase in  
235 total *Vegfa* mRNA levels from E15.5 to the adult stage (**Figure S3D**) which is associated with  
236 an increase of the VEGFA protein levels, as assessed through ELISA analysis of whole lung  
237 protein lysates (**Figure S3E**). From the *Vegfa* isoforms, we found that there is a significant  
238 increase in *Vegfa 120* and *164* from E15.5 to P8 (fold change of 4.35 and 2.78, respectively)  
239 (**Figure 4D**). The expression levels of these isoforms remain high at P21 and adult lungs. On  
240 the other hand, *Vegfa 188* levels sharply increase at E19.5 (fold change of 18.09 between  
241 E15.5 and E19.5), just before birth and then increase even further at P8, P21 and adult (fold  
242 change of 28.38, 61.13 and 62.46 between E15.5 and P8, E15.5 and P21, and E15.5 and Adult,  
243 respectively) (**Figure 4D**). *Vegfa i5* increases from E15.5 to E17.5 (fold change of 3.89), and  
244 further increases at P8 (fold change of 14.06 between E15.5 and P8), remaining high at P21  
245 and adult (**Figure 4D**). Importantly, the increase in *Vegfa 188* and *i5* is much higher than that  
246 of *Vegfa 120* and *164* (fold change of 28.38, 14.06 compared to 4.35, 2.78 between E15.5 and  
247 P8, respectively). These observations suggest that the relative proportion between *Vegfa*  
248 isoforms changes during lung development. Although RT-qPCR allows the accurate  
249 quantification of each isoform, it is not the most suitable method to compare relative changes  
250 in expression levels between multiple isoforms.

251 To be able to perform this analysis, we performed end-point PCR followed by polyacrylamide  
252 gel electrophoresis (PAGE). For that, we used a single primer pair that hybridizes at *Vegfa* 5'  
253 and 3' UTRs and that amplifies the *Vegfa* isoforms *120*, *164* and *188* (**Figure 4C**, primers F1  
254 and R1). The amplification of these 3 isoforms was detectable by the presence of three  
255 distinct bands with the size corresponding to each of these isoforms (**Figure 4E**). Although this

256 pair of primers should theoretically be able to amplify the *Vegfa i5* isoform as well, it does  
257 not. This happens probably due to its larger size when compared to the other isoforms (2511  
258 bp vs 571, 703 and 775 bp) and to its lower level of expression (**Figure 4A**), which makes it  
259 more difficult to be amplified when in competition with the lower size and abundant isoforms.  
260 Nevertheless, we could use this technique to evaluate changes in the proportions between  
261 the expression of isoforms *Vegfa 120*, *164* and *188*. This analysis revealed that *Vegfa 164* is  
262 the isoform more predominantly expressed in bulk lungs at the embryonic time-points,  
263 followed by *Vegfa 120*, with only a minor contribution from *Vegfa 188*. From E17.5 onwards,  
264 the proportion of *Vegfa 188* gradually increases, reaching a maximum of 70% in the adult.  
265 Reciprocally, the relative proportions of both *120* and *164* decrease (**Figure 4E, S3F**). These  
266 results are concordant with previously published results obtained using RNA protection  
267 assays from RNA extracted from mouse lungs during development <sup>16</sup>.  
268 In sum, we found that all the detected *Vegfa* isoforms start to progressively increase before  
269 birth and further increase after birth, which coincides with an overall increase in total *Vegfa*  
270 levels. However, they increase at distinct rates during lung development: *Vegfa 188* and *Vegfa*  
271 *i5* isoforms undergo a marked differential increase, when compared to that of *120* and *164*.  
272 This demonstrates the occurrence of *Vegfa* AS during lung development towards the  
273 expression of the exon 6-containing isoforms. Remarkably, our fine-grained analysis shows an  
274 increase in the relative proportion of *Vegfa 188* starting before birth. These observations  
275 suggest that *Vegfa* AS coincides with a developmental adaptation to birth.

276

277 ***Vegfa* isoforms are differentially expressed between endothelial and epithelial populations**  
278 **during lung development**

279 Our results showed that *Vegfa* undergoes AS changes during lung development. However, it  
280 was unclear which cell types express which *Vegfa* isoforms and what is their expression  
281 dynamics within the different cell types. Previously, *Vegfa* expression was documented in ECs,  
282 AT1 and AT2 cells by *in situ* hybridization<sup>16,17,24</sup>. More recently, genetic LacZ reporters and  
283 scRNAseq analyses have reported the expression of *Vegfa* only in AT1 and ECs<sup>8,14,38,39</sup>. Yet,  
284 these studies have only examined global levels of *Vegfa* transcripts. To unravel which cells  
285 express the different *Vegfa* isoforms, we isolated various lung cell types at different time-  
286 points of development and assessed how *Vegfa* isoforms expression varies within each cell  
287 type (**Figure 5A**). We examined lungs at E15.5, E17.5, E18.5, E19.5, P0, P5, P8, P21 and adult,  
288 in accordance with our analysis in bulk lungs. To isolate the different lung cell types, we  
289 dissociated the lung tissue into a single-cell suspension and performed fluorescence-activated  
290 cell sorting (FACS) using antibodies for cell type-specific markers. The combination of these  
291 markers allowed the isolation of cell populations enriched for endothelial cells (CD31 single  
292 positive (SP): CD31<sup>+</sup>, EpCAM<sup>-</sup>, CD45<sup>-</sup>), epithelial cells (EpCAM SP: CD31<sup>-</sup>, EpCAM<sup>+</sup>, CD45<sup>-</sup>),  
293 immune cells (CD45 SP: CD31<sup>-</sup>, EpCAM<sup>-</sup>, CD45<sup>+</sup>) and mesenchymal cells, such as alveolar  
294 myofibroblasts and pericytes (triple negative (TN): CD31<sup>-</sup>, EpCAM<sup>-</sup>, CD45<sup>-</sup>) (**Figure 5B**). The  
295 analysis of gene expression changes was performed by RNA extraction from the isolated cell  
296 populations followed by RT-qPCR or end-point PCR (**Figure 5A**).

297 We first evaluated the quality of the isolation of the different cell populations. For that, we  
298 examined the expression of cell type-specific markers in the different cell populations  
299 collected at P5 by RT-qPCR. We analysed the mRNA levels of *Pecam1* (CD31) and *Cdh5* as pan-  
300 endothelial-specific markers, of *Prox1* as a marker for lymphatic ECs, of *Epcam* and *Cdh1* as  
301 pan-epithelial-specific markers, and of *Cd45* as a pan-immune cell marker. We identified that  
302 only CD31 SP population expresses *Pecam1* (CD31) and *Cdh5* (**Figure S4A**). However, this

303 population also expresses high levels of *Prox1* (**Figure S4A**), suggesting that CD31 SP contains  
304 a mixture of blood and lymphatic ECs. We also showed that only EpCAM SP population  
305 expresses *Epcam* and *Cdh1*, and that only CD45 SP expresses *Cd45*, while TN cells do not  
306 express any of these markers (**Figure S4A**). In addition, by analyzing the mRNA levels of *Aqp5*,  
307 *Sftpc* and *Foxj1*, markers of epithelial alveolar AT1, AT2 and ciliated cells, respectively, we  
308 demonstrated that the EpCAM SP population is composed by a mixture of these lung  
309 epithelial subtypes (**Figure S4A**).

310 To estimate the contribution of each endothelial and epithelial subtypes in CD31 SP and  
311 EpCAM SP populations, we analysed the expression of cell type-specific markers at the protein  
312 level in single cell suspensions before sorting (pre-sort) and after sorting using cyospin  
313 preparation<sup>40</sup> and immunostaining. We observed that CD31 SP population is highly enriched  
314 for CD31-positive cells, as compared to the pre-sort sample. Of these, about 60% are also  
315 positive for ERG, a marker of blood endothelial cells (**Figure S4B**). The remaining fraction of  
316 CD31-positive cells is likely composed of lymphatic ECs, as suggested by the enrichment in  
317 expression of the lymphatic ECs marker *Prox1* in this population (**Figure S4A**). EpCAM SP  
318 population is enriched for AQP5-positive and SFTPC-positive cells (21.2% and 79.2% on  
319 average, respectively), demonstrating that this population is enriched for both epithelial AT1  
320 and AT2 cells (**Figure S4C-D**). Altogether, these results validate the quality of our method for  
321 isolation of different lung cell types.

322 We then analysed the expression changes of each *Vegfa* isoform in each cell population along  
323 lung development by RT-qPCR. Total *Vegfa* expression is highest in EpCAM SP in all time-  
324 points analysed, followed by CD31 SP population (**Figure S5A**). In addition, we found that  
325 CD31 SP and EpCAM SP populations reveal the highest fold changes in total *Vegfa* expression  
326 during development, when compared to CD45 SP and TN populations (fold change between

327 E15.5 and adult of 45.21, 22.90, 4.70, and 3.87, respectively) (**Figure 5C**). Therefore, to  
328 characterize *Vegfa* AS, we focused our analysis in EpCAM SP and CD31 SP populations We  
329 found that in the CD31 SP population *Vegfa 120, 164, 188* and *i5* steadily increase during lung  
330 development from E18.5 to adult (**Figure 5D**). The analysis of *Vegfa* isoforms relative  
331 proportions by end-point PCR and PAGE revealed that *Vegfa 164* is the most abundant  
332 isoform and that there was no significant change in the proportion between the *Vegfa*  
333 isoforms during lung development in CD31 SP population (**Figure 5F-G, S5B**). These results  
334 suggest that AS of *Vegfa* does not significantly change in the EC population.

335 In EpCAM SP population, *Vegfa 120* and *164* increase before birth from E15.5 onwards,  
336 peaking at P0, after which decrease until P21. *Vegfa 188* and *i5* increase from E17.5 until P5  
337 (**Figure 5E**). In the adult, *Vegfa 120, 164* and *188* exhibit the highest levels both in EpCAM SP  
338 and CD31 SP populations (**Figure 5D-E**).

339 Analysis of the relative proportions of *Vegfa* isoforms in EpCAM SP population through end-  
340 point PCR and PAGE showed that there is a prominent increase in the relative proportion of  
341 *Vegfa 188* in epithelial cells throughout lung development (**Figure 5F-G, S5C**). While in  
342 embryonic time-points *Vegfa 164* and *Vegfa 120* are the predominant isoforms, the  
343 proportion of *Vegfa 188* increases progressively throughout development and, at postnatal  
344 time-points, it becomes the most abundant isoform expressed in EpCAM SP cells (**Figure 5G,**  
345 **S5C**). These results suggest that the signature of AS for *Vegfa* that we have first detected on  
346 bulk lungs is associated with changes occurring in the epithelial lineage.

347 In sum, our results suggest that the endothelial and epithelial lineages express the highest  
348 *Vegfa* levels and that *Vegfa* expression increases in both during lung development. While in  
349 ECs, *Vegfa 164* is always the predominant isoform, in epithelial cells there is a marked

350 increase in the proportion of *Vegfa 188*, from E17.5 onwards. These results suggest a cell  
351 type-specific AS of *Vegfa* in epithelial cells during lung development at the perinatal period.

352

### 353 ***Vegfa* undergoes AS in epithelial AT1 cells during lung development**

354 The EpCAM SP population is composed of multiple subtypes such as epithelial alveolar AT1,  
355 AT2 and epithelial bronchiolar ciliated cells (**Figure S4A, C, D**). To dissect the contribution of  
356 each epithelial cell subtype for the expression of *Vegfa* isoforms, we further subdivided  
357 EpCAM-positive population into AT1- and AT2-enriched subpopulations by FACS in P5 lungs  
358 (**Figure 6A**), a stage at which *Vegfa* expression in the epithelial lineage is high (**Figure S5A**).

359 For that, we used the marker major histocompatibility complex class II (MHC II) which, in  
360 combination with EpCAM, has been previously shown to discriminate between AT1  
361 (EpCAM<sup>low</sup> MHC II<sup>-</sup>), AT2 (EpCAM<sup>high</sup> MHC II<sup>+</sup>), and ciliated cells (EpCAM<sup>high</sup> MHC II<sup>-</sup>)<sup>41</sup>. We  
362 could identify within the EpCAM-positive cell population the presence EpCAM<sup>low</sup> MHC II<sup>-</sup> and  
363 EpCAM<sup>high</sup> MHC II<sup>+</sup> subpopulations putatively corresponding to AT1 and AT2, respectively  
364 (**Figure 6B**). However, we detected very few EpCAM<sup>high</sup> MHC II<sup>-</sup> cells, putative ciliated cells,  
365 and, therefore, this subpopulation was not further analysed (**Figure 6B**).

366 mRNA analysis of the selected subpopulations by RT-qPCR revealed that none of these two  
367 subpopulations expresses *Pecam1* (CD31) nor *Cd45*, while both express *Epcam* mRNA (**Figure**  
368 **S6A**). In addition, by RT-qPCR, we found that EpCAM<sup>low</sup> MHC II<sup>-</sup> cells express high levels of  
369 *Aqp5* mRNA and low levels of *Sftpc* mRNA, while EpCAM<sup>high</sup> MHC II<sup>+</sup> cells express high levels  
370 of *Sftpc* mRNA and low levels of *Aqp5* mRNA (**Figure S6B**), suggesting that indeed they are  
371 enriched for AT1 and AT2 cells, respectively. None of these two subpopulations is enriched  
372 for a marker of epithelial bronchial ciliated cells *Foxj1* mRNA, as compared to EpCAM SP  
373 population (**Figure S6B**), suggesting that this cell type was not collected in this analysis.



374 Complementarily, by cytospin and immunofluorescence, we found that 54.5% of EpCAM<sup>low</sup>  
375 MHC II<sup>-</sup> cells are AQP5-positive cells, while 87.8% of EpCAM<sup>high</sup> MHC II<sup>+</sup> cells are SFTPC-positive  
376 cells (**Figure S6C-D**). Thus, this analysis revealed that this FACS gating strategy enables the  
377 isolation of subpopulations enriched for epithelial AT1 and AT2 cells.

378 Analysis of *Vegfa* expression levels in AT1- and AT2-enriched subpopulations through RT-qPCR  
379 revealed that *Vegfa* isoforms expression is markedly higher in AT1 cells than in AT2 cells  
380 (**Figure 6C**), in agreement with recent scRNAseq results<sup>8,39,42</sup>. While there is only a moderate  
381 increase in the expression of *Vegfa 164*, the levels of expression of *Vegfa 188* and *Vegfa i5*  
382 are markedly higher in AT1 than in AT2 (fold change of 2.87, 31.60 and 14.53, respectively)  
383 (**Figure 6C**). The levels of *Vegfa 120* are not significantly distinct between both  
384 subpopulations. Through end-point PCR and PAGE, we found that *Vegfa 188* is the isoform  
385 whose expression is predominant in AT1 cells at P5 (**Figure 6D, S6E**). Our results suggest that  
386 the expression of *Vegfa 188* in EpCAM SP population is due to its expression in AT1 cells.

387 *Vegfa 188* starts to be expressed in EpCAM SP population at E17.5 (**Figure 5E**). Interestingly,  
388 it is just before this time-point that AT1 cells start differentiating from AT1/AT2 progenitor  
389 cells<sup>3,15,39</sup>. This led us to question if the increase in *Vegfa 188* proportion in EpCAM SP  
390 population is solely due to an increase in the fraction of AT1 within EpCAM SP population  
391 during development, as we detected by FACS (**Figure S6F**), or if the predominance of *Vegfa*  
392 *188* within AT1 cells also increases during development. To disentangle between these two  
393 possibilities, we analysed *Vegfa* isoforms expression in AT1 cells at E18.5, a time-point just  
394 after their specification, and compared it to that in AT1 cells at P5. By RT-qPCR analysis, we  
395 found that *Vegfa* isoforms expression increase in AT1 cells from E18.5 to P5. This increase is  
396 mild for *Vegfa 120* and *164*, but it is higher for *Vegfa 188* and *Vegfa i5* (fold change of 1.37,  
397 1.38, 2.54 and 2.08, respectively) (**Figure 6E**). Accordingly, although at E18.5 *Vegfa 188*

398 proportion is already 42% of the total, its proportion further increases at P5 to 49% (**Figure**  
399 **6F, S6E**). Altogether, our results suggest that *Vegfa* undergoes AS changes in epithelial AT1  
400 cells during lung development.

## 401 Discussion

402 Lung alveolar formation starts during late embryonic development and continues postnatally  
403 during the first weeks after birth. The distinct cell types that compose the developing alveoli  
404 experience dramatic changes at birth. Oxygen tension, mechanical stretch due to respiratory  
405 movements and blood flow rates dramatically increase. However, how the distinct lung cell  
406 types adapt to such dramatic changes is still not fully understood.

407 AS is a wide phenomenon driving developmental changes. However, the regulation of AS  
408 during lung development at a genome-wide level had not been explored before. This work  
409 represents the first comprehensive analysis of the precise dynamics of AS during lung  
410 development at a genome-wide scale. Our analysis uncovered the occurrence of AS in the  
411 mouse lung during the embryonic-to-postnatal transition. We identified numerous genes that  
412 undergo AS at this transition, creating two clusters that exhibit distinct kinetics between  
413 embryonic and postnatal stages. We identified AS changes in key cell-cell adhesion complexes  
414 and signaling pathways known to regulate intercellular communication between epithelial,  
415 endothelial and other lung cell types during lung development: adherens and tight junctions,  
416 and VEGF and Hippo signaling pathways<sup>7,8,49,50</sup>. Overall, this raises the hypothesis that  
417 regulation of AS can be a means of modulating intercellular communication in lungs towards  
418 functional respiration. Remarkably, the number of AS changes in genes that do not undergo  
419 gene expression changes was considerably higher than in genes that undergo gene expression  
420 changes. Thus, it is tempting to speculate that the program of adaptation to birth through AS  
421 is largely independent of the gene expression program operating at this stage. Therefore, we  
422 postulate that further investigation into the mechanisms governing AS in lung could be  
423 relevant for development and pathology. Supporting this vision, several studies have already

424 associated AS and different lung conditions, such as lung cancer, idiopathic pulmonary  
425 fibrosis, and chronic obstructive pulmonary disease <sup>43,44</sup>.

426 Through bioinformatics analysis, we identified *Cpeb4*, *Elavl2* and hnRNP A1 as RPBs  
427 potentially regulating DAS in mouse lungs. *Cpeb4* regulates polyadenylation of the 3'UTR of  
428 mRNA transcripts and thus, the stability and translational output and has previously been  
429 shown to bind to and regulate *Vegfa* <sup>45</sup>. hnRNP A1 has been shown to bind to intronic or  
430 exonic splice silencers to regulate splicing of alternative exons <sup>11</sup>. *Elavl2*/HuB belongs to the  
431 family of Hu proteins that have been implicated in the regulation of AS and alternative  
432 polyadenylation <sup>46</sup>. *Cpeb4* or *Elavl2* knock out mice are viable <sup>47,48</sup>, thus suggesting a mild  
433 effect in lung development, whilst *Hnrnpa1* knock out mice die perinatally with cardiac  
434 defects but analysis of lungs was not reported <sup>48</sup>. Regardless, further investigation on the  
435 biological relevance of each of these factors, and combinatorial effects, is warranted to  
436 validate their roles in lung development.

437 We have further explored AS of *Vegfa* gene. Although changes in the relative proportion of  
438 *Vegfa* isoforms have previously been described to occur during development <sup>16-18</sup>, it was not  
439 known which cell types in the lung express the different *Vegfa* isoforms, nor if the switch in  
440 *Vegfa* AS occurs in a tissue or cell type-specific manner. We identified that *Vegfa* transcript  
441 levels increase both in ECs and in AT1 cells during alveolar development. However, while in  
442 the embryonic period, *Vegfa 164* is the predominant isoform expressed in both cell  
443 populations, in the postnatal period, *Vegfa 188* becomes predominant specifically in AT1 cells.  
444 Our results suggest the occurrence of a cell type-specific AS of *Vegfa* in AT1 cells during late  
445 lung development. Interestingly, the sharp increase in *Vegfa 188* expression from E18.5 to  
446 E19.5 suggests that epithelial *Vegfa 188* could be associated with a pre-birth adaptation of  
447 lungs to the postnatal life. It will be interesting to explore how such cell-type specificity of AS

448 is encoded. Specifically, which splicing regulators control this AS event and to explore if other  
449 transcripts undergo AS changes within this developmental time interval of lung development  
450 in this cell population.

451 AT1-derived *Vegfa* expression is important for the specification of Car4-positive ECs (also  
452 known as aCap or aerocytes), a specialized alveolar EC subtype, <sup>8,38</sup>. Remarkably, the  
453 specification of this cell type seems to occur just before birth, around E19.5 <sup>8</sup>. It is, however,  
454 unclear which *Vegfa* isoform(s) drive(s) this effect. We found a significant increase in *Vegfa*  
455 *188* expression from E17.5 to E19.5 in AT1 cells, reaching around 50% of total *Vegfa*  
456 transcripts. This observation led us to hypothesize that *Vegfa 188* could specifically be the  
457 isoform driving Car4-positive ECs specification in developing lung alveoli and, thus, AS could  
458 represent a means of regulating intercellular communication.

459 We also found a marked increase in *Vegfa* expression during lung development in ECs, in  
460 which *Vegfa 164* is the predominant isoform in all time-points analysed. However, it remains  
461 to be determined what is the role of EC-derived *Vegfa* both during development and at the  
462 adult stage. Previous results from different authors on the effects in the lung of EC-specific  
463 *Vegfa* deletion are conflicting. On one hand, Lee et al. reported that non-inducible *Vegfa* EC-  
464 specific knock out resulted in premature death and, in the case of surviving mice, these  
465 exhibited lungs with increased chronic inflammation and fibrosis, EC rupture, and collapsed  
466 lumen <sup>51</sup>. On the other hand, Ellis et al. reported that the EC-specific deletion of *Vegfa* at P3  
467 elicits no effects in lung alveolar morphology at P9 <sup>8</sup>. The reasons for this discrepancy are  
468 unclear. It is possible that the *Vegfa* deletion in ECs is compensated by the endogenous or  
469 ectopic expression of *Vegfa* in AT1 cells.

470 Another intriguing observation is that *Vegfa* expression in alveolar AT1 and ECs keeps  
471 increasing after birth. In many tissues, the formation of new blood vessels usually occurs in

472 response to hypoxia. Under low oxygen tension, hypoxia-inducible factors (HIFs) are  
473 protected from proteolytic degradation, become stable, and activate the expression of a  
474 myriad of transcriptional targets, among which is *Vegfa*<sup>52</sup>. Yet, after birth, lung alveoli  
475 become filled with oxygen-rich air. This suggests that *Vegfa* expression in the postnatal lungs  
476 must be independent of hypoxia. Understanding the mechanisms that allow the uncoupling  
477 between hypoxia and *Vegfa* levels in postnatal lungs deserves attention in the future.

478 In addition to the previously described *Vegfa* isoforms, we have identified a novel *Vegfa*  
479 isoform that has undergone splicing of all introns except of intron 5, to which we called *Vegfa*  
480 *i5*. This isoform is expressed during lung development both in ECs and AT1 cells. Intron  
481 retention is a widespread phenomenon shown to have a functional impact in development,  
482 physiology, and disease<sup>53–55</sup>. Isoforms containing retained introns may have multiple fates:  
483 to encode functionally distinct alternative protein products, to originate prematurely  
484 truncated proteins that are targeted for degradation, or having their mRNAs targeted for  
485 degradation through nonsense-mediated decay<sup>53–55</sup>. However, if this mRNA species was  
486 rapidly eliminated after its production, the probability of detecting it through RNAseq would  
487 very low. Alternatively, the excision of retained introns from pre-spliced mRNAs has also been  
488 shown to allow a rapid production of the mature mRNA in response to extracellular stimuli  
489<sup>54,56</sup>. It will be relevant to identify how the generation of this novel *Vegfa* mRNA isoform is  
490 controlled, and to address its functional significance during lung development. In addition, it  
491 has been described that gene expression changes and RNA polymerase II elongation rate may  
492 be coupled with changes in AS<sup>57</sup>. Since we found that both *Vegfa* gene expression and its AS  
493 pattern change during lung development, it will be interesting to address if the occurrence of  
494 these events on *Vegfa* is interdependent.

495 In sum, our work contributes for a better understanding of the mechanisms driving  
496 alveologensis and sets the ground for the study of the role of AS dynamics during lung  
497 development.

498

499 [Declaration of interests](#)

500 The authors declare no competing interests.

501

502 [Acknowledgements](#)

503 Mariana Ferreira, Marie Bordone, Nuno Agostinho and Nuno Barbosa Morais (Disease

504 Transcriptomics Lab, iMM) for input on bioinformatics analysis.

505 Pedro Papotto, Karine Serre (Immuno-Biology & Immuno-Oncology Lab, iMM), Idálio Viegas

506 (Biology of Parasitism Lab, iMM), Isabel Alcobia (Institute of Histology and Developmental

507 Biology, FMUL), Debanjan Mukherjee, Vanessa Zuzarte-Luís (Biology & Physiology of

508 Malaria, iMM), and Mahak Singhal (Vascular Oncology and Metastasis Division, DKFZ), for

509 input on experimental protocols.

510 Luís Oliveira (Cell Architecture Lab, iMM) for input on microscopy image analysis.

511 Flow Cytometry, Bioimaging and Rodent facilities at iMM for technical support.

512 All members of the Vascular Morphogenesis lab at iMM for discussions, helpful input and

513 for carefully reviewing the manuscript.

514 Nuno Barbosa Morais for carefully reading this manuscript and providing helpful and critical

515 feedback.

516

517 [Author contribution](#)

518 According to CRediT – Contributor Roles Taxonomy:

519 Conceptualization - MFF, CGF, FFV, CAF

520 Data curation - MFF, CGF, TB, AARFR, FFV, PC, ARG



- 521 Formal Analysis - MFF, CGF, TB, AARFR, FFV, PC, ARG
- 522 Funding acquisition – FFV, CAF
- 523 Investigation - MFF, CGF, TB, AARFR, FFV, PC, ARG
- 524 Methodology – FFV, MFF, CGF, CAF, PC, ARG
- 525 Project administration – FFV, CAF
- 526 Resources - MFF, CGF, TB, AARFR, FFV
- 527 Software - CGF, AARFR, FFV, PC, ARG
- 528 Supervision – FFV, CAF
- 529 Validation – MFF, CGF, FFV, PC, ARG
- 530 Visualization – MFF, CGF, FFV, PC, ARG
- 531 Writing – original draft – FFV, MFF
- 532 Writing – review & editing - MFF, CGF, TB, AARFR, FFV, CAF, PC, ARG

533

#### 534 Funding

535 This work was supported by European Research Council (ERC starting grant (679368), the  
536 European Union (H2020-TWINN-2015 – Twinning (692322), Fundação para a Ciência e  
537 Tecnologia (FCT) (PTDC/MED-PAT/31639/2017, and UIDP/04378/2020 of the Research Unit  
538 on Applied Molecular Biosciences - UCIBIO), and Fondation Leducq (17CVD03).

539 CGF was supported by a PhD fellowship from the doctoral program Bioengineering: Cellular  
540 Therapies and Regenerative Medicine funded by Fundação para a Ciência e Tecnologia (FCT)  
541 (PD/BD/128375/2017).

542 TB was supported by a PhD fellowship from the doctoral program "Oncology, Hematology and  
543 Pathology - 30th Cycle" funded by University of Bologna, Italy.

544 PC was supported by a postdoctoral researcher fellowship from FCT (PTDC/MED-  
545 ONC/28660/2017).

546 AASFR was supported by PAC-PRECISE-LISBOA-01-0145-FEDER-016394 and an assistant  
547 researcher contract (CEECIND/01474/2017).

548 ARG was supported by a principal investigator contract from FCT (CEECIND/02699/2017).

549 FFV was supported by a postdoctoral researcher contract from FCT (CEECIND/04251/2017).

550 CAF was supported by a principal investigator contract from FCT (CEECIND/02589/2018).

551

## 552 Ethics

553 Animal experimentation: Mice were maintained at the Instituto de Medicina Molecular under  
554 standard husbandry conditions and under national regulations, under the license  
555 AWB\_2015\_11\_CAF\_Polaridade / ex vivo\_surplus\_not of use.

556

## 557 References

- 558 1. Mammoto, A. & Mammoto, T. Vascular Niche in Lung Alveolar Development,  
559 Homeostasis, and Regeneration. *Front. Bioeng. Biotechnol.* **7**, 1–16 (2019).
- 560 2. Hogan, B. L. M. *et al.* Repair and regeneration of the respiratory system: Complexity,  
561 plasticity, and mechanisms of lung stem cell function. *Cell Stem Cell* **15**, 123–138  
562 (2014).
- 563 3. Vila Ellis, L. & Chen, J. A cell-centric view of lung alveologenesis. *Dev. Dyn.* (2020)  
564 doi:10.1002/dvdy.271.
- 565 4. Kina, Y. P., Khadim, A., Seeger, W. & El Agha, E. The Lung Vasculature: A Driver or

- 566 Passenger in Lung Branching Morphogenesis? *Front. Cell Dev. Biol.* **8**, 1–7 (2021).
- 567 5. Zepp, J. A. *et al.* Genomic, epigenomic, and biophysical cues controlling the  
568 emergence of the lung alveolus. *Science (80-. )*. **371**, (2021).
- 569 6. Ellis, L. V. *et al.* Epithelial Vegfa specifies a distinct endothelial population in the  
570 mouse lung. *bioRxiv* **52**, (2019).
- 571 7. Yamamoto, H. *et al.* Epithelial-vascular cross talk mediated by VEGF-A and HGF  
572 signaling directs primary septae formation during distal lung morphogenesis. *Dev.*  
573 *Biol.* **308**, 44–53 (2007).
- 574 8. Vila Ellis, L. *et al.* Epithelial Vegfa Specifies a Distinct Endothelial Population in the  
575 Mouse Lung. *Dev. Cell* **52**, 617-630.e6 (2020).
- 576 9. Thébaud, B. *et al.* Vascular endothelial growth factor gene therapy increases survival,  
577 promotes lung angiogenesis, and prevents alveolar damage in hyperoxia-induced lung  
578 injury: Evidence that angiogenesis participates in alveolarization. *Circulation* **112**,  
579 2477–2486 (2005).
- 580 10. Farini, D. *et al.* A Dynamic Splicing Program Ensures Proper Synaptic Connections in  
581 the Developing Cerebellum. *Cell Rep.* **31**, 107703 (2020).
- 582 11. Baralle, F. E. & Giudice, J. Alternative splicing as a regulator of development and  
583 tissue identity. *Nat. Rev. Mol. Cell Biol.* **18**, 437–451 (2017).
- 584 12. Weyn-Vanhentenryck, S. M. *et al.* Precise temporal regulation of alternative splicing  
585 during neural development. *Nat. Commun.* **9**, (2018).
- 586 13. Brinegar, A. E. *et al.* Extensive alternative splicing transitions during postnatal skeletal  
587 muscle development are required for calcium handling functions. *Elife* **6**, (2017).
- 588 14. Treutlein, B. *et al.* Reconstructing lineage hierarchies of the distal lung epithelium  
589 using single-cell RNA-seq. *Nature* **509**, 371–375 (2014).

- 590 15. Wang, Y. *et al.* Pulmonary alveolar type I cell population consists of two distinct  
591 subtypes that differ in cell fate. *Proc. Natl. Acad. Sci. U. S. A.* **115**, 2407–2412 (2018).
- 592 16. Ng, Y. S., Rohan, R., Sunday, M. E., Demello, D. E. & D'Amore, P. A. Differential  
593 expression of VEGF isoforms in mouse during development and in the adult. *Dev.*  
594 *Dyn.* **220**, 112–121 (2001).
- 595 17. Greenberg, J. M. *et al.* Mesenchymal Expression of Vascular Endothelial Growth  
596 Developing Lung. **153**, 144–153 (2002).
- 597 18. Healy, A. M., Morgenthau, L., Zhu, X. & Farber, H. W. VEGF Is Deposited in the  
598 Subepithelial Matrix at the Leading Edge of Branching Airways and Stimulates  
599 Neovascularization in the Murine Embryonic Lung. **352**, 341–352 (2000).
- 600 19. Domigan, C. K. *et al.* Autocrine VEGF maintains endothelial survival through  
601 regulation of metabolism and autophagy. *J. Cell Sci.* **128**, 2236–2248 (2015).
- 602 20. Peach, C. J. *et al.* Molecular pharmacology of VEGF-A isoforms: Binding and signalling  
603 at VEGFR2. *Int. J. Mol. Sci.* **19**, (2018).
- 604 21. Yamamoto, H., Rundqvist, H., Branco, C. & Johnson, R. S. Autocrine VEGF isoforms  
605 differentially regulate endothelial cell behavior. *Front. Cell Dev. Biol.* **4**, 1–12 (2016).
- 606 22. Bowler, E. & Oltean, S. Alternative splicing in angiogenesis. *Int. J. Mol. Sci.* **20**, (2019).
- 607 23. Galambos, C. *et al.* Defective pulmonary development in the absence of heparin-  
608 binding vascular endothelial growth factor isoforms. *Am. J. Respir. Cell Mol. Biol.* **27**,  
609 194–203 (2002).
- 610 24. Compennolle, V. *et al.* Loss of HIF-2 $\alpha$  and inhibition of VEGF impair fetal lung  
611 maturation, whereas treatment with VEGF prevents fatal respiratory distress in  
612 premature mice. *Nat. Med.* **8**, 702–710 (2002).
- 613 25. Beauchemin, K. J. *et al.* Temporal dynamics of the developing lung transcriptome in

- 614 three common inbred strains of laboratory mice reveals multiple stages of postnatal  
615 alveolar development. (2016) doi:10.7717/peerj.2318.
- 616 26. LungMAP. [www.lungmap.net](http://www.lungmap.net).
- 617 27. Domingo-Gonzalez, R. *et al.* Diverse homeostatic and immunomodulatory roles of  
618 immune cells in the developing mouse lung at single cell resolution. *Elife* **9**, 1–39  
619 (2020).
- 620 28. Tapial, J. *et al.* An atlas of alternative splicing profiles and functional associations  
621 reveals new regulatory programs and genes that simultaneously express multiple  
622 major isoforms. 1759–1768 (2017) doi:10.1101/gr.220962.117.
- 623 29. Irimia, M. *et al.* A highly conserved program of neuronal microexons is misregulated  
624 in autistic brains. *Cell* **159**, 1511–1523 (2014).
- 625 30. Gardina, P. J. *et al.* Alternative splicing and differential gene expression in colon  
626 cancer detected by a whole genome exon array. *BMC Genomics* **7**, 325 (2006).
- 627 31. Grosso, A. R. *et al.* Tissue-specific splicing factor gene expression signatures. *Nucleic*  
628 *Acids Res.* **36**, 4823–4832 (2008).
- 629 32. Ray, D. *et al.* A compendium of RNA-binding motifs for decoding gene regulation.  
630 *Nature* **499**, 172–177 (2013).
- 631 33. Gohr, A. & Irimia, M. Matt: Unix tools for alternative splicing analysis. *Bioinformatics*  
632 **35**, 130–132 (2019).
- 633 34. Yu, M. *et al.* Lack of Bcr and Abr Promotes Hypoxia-Induced Pulmonary Hypertension  
634 in Mice. *PLoS One* **7**, e49756 (2012).
- 635 35. Tian, Y. *et al.* Quantitative proteomic characterization of lung tissue in idiopathic  
636 pulmonary fibrosis. *Clin. Proteomics* **16**, 6 (2019).
- 637 36. Eichmann, A. & Simons, M. VEGF signaling inside vascular endothelial cells and

- 638 beyond. *Curr. Opin. Cell Biol.* **24**, 188–193 (2012).
- 639 37. Bray, N. L., Pimentel, H., Melsted, P. & Pachter, L. Near-optimal probabilistic RNA-seq  
640 quantification. *Nat. Biotechnol.* **34**, 525–527 (2016).
- 641 38. Gillich, A. *et al.* Capillary cell-type specialization in the alveolus. *Nature* **586**, 785–789  
642 (2020).
- 643 39. Yang, J. *et al.* The development and plasticity of alveolar type 1 cells. *Dev.* **143**, 54–65  
644 (2016).
- 645 40. Koh, C. M. Chapter Sixteen - Preparation of Cells for Microscopy using Cytospin. in  
646 *Laboratory Methods in Enzymology: Cell, Lipid and Carbohydrate* (ed. Lorsch, J. B. T.-  
647 M. in E.) vol. 533 235–240 (Academic Press, 2013).
- 648 41. Hasegawa, K. *et al.* Fraction of MHCII and EpCAM expression characterizes distal lung  
649 epithelial cells for alveolar type 2 cell isolation. *Respir. Res.* **18**, 1–13 (2017).
- 650 42. Raredon, M. S. B. *et al.* Single-cell connectomic analysis of adult mammalian lungs.  
651 *Sci. Adv.* **5**, 1–16 (2019).
- 652 43. Coomer, A. O., Black, F., Greystoke, A., Munkley, J. & Elliott, D. J. Alternative splicing  
653 in lung cancer. *Biochim. Biophys. acta. Gene Regul. Mech.* **1862**, 194388 (2019).
- 654 44. Kusko, R. L. *et al.* Integrated Genomics Reveals Convergent Transcriptomic Networks  
655 Underlying Chronic Obstructive Pulmonary Disease and Idiopathic Pulmonary  
656 Fibrosis. *Am. J. Respir. Crit. Care Med.* **194**, 948–960 (2016).
- 657 45. Calderone, V. *et al.* Sequential Functions of CPEB1 and CPEB4 Regulate Pathologic  
658 Expression of Vascular Endothelial Growth Factor and Angiogenesis in Chronic Liver  
659 Disease. *Gastroenterology* **150**, 982-997.e30 (2016).
- 660 46. Pascale, A., Amadio, M. & Quattrone, A. Defining a neuron: Neuronal ELAV proteins.  
661 *Cell. Mol. Life Sci.* **65**, 128–140 (2008).

- 662 47. Kato, Y. *et al.* ELAVL2-directed RNA regulatory network drives the formation of  
663 quiescent primordial follicles. *EMBO Rep.* **20**, e48251 (2019).
- 664 48. Liu, T.-Y. *et al.* Muscle developmental defects in heterogeneous nuclear  
665 Ribonucleoprotein A1 knockout mice. *Open Biol.* **7**, (2017).
- 666 49. Kato, K. *et al.* Pulmonary pericytes regulate lung morphogenesis. *Nat. Commun.* **9**, 1–  
667 14 (2018).
- 668 50. Nantie, L. B. *et al.* Lats1/2 inactivation reveals hippo function in alveolar type i cell  
669 differentiation during lung transition to air breathing. *Dev.* **145**, (2018).
- 670 51. Lee, S. *et al.* Autocrine VEGF Signaling Is Required for Vascular Homeostasis. 691–703  
671 (2007) doi:10.1016/j.cell.2007.06.054.
- 672 52. Krock, B. L., Skuli, N. & Simon, M. C. Hypoxia-induced angiogenesis: good and evil.  
673 *Genes Cancer* **2**, 1117–1133 (2011).
- 674 53. Yue, L., Wan, R., Luan, S., Zeng, W. & Cheung, T. H. Dek Modulates Global Intron  
675 Retention during Muscle Stem Cells Quiescence Exit. *Dev. Cell* **53**, 661-676.e6 (2020).
- 676 54. Jacob, A. G. & Smith, C. W. J. Intron retention as a component of regulated gene  
677 expression programs. *Hum. Genet.* **136**, 1043–1057 (2017).
- 678 55. Wong, J. J. L., Au, A. Y. M., Ritchie, W. & Rasko, J. E. J. Intron retention in mRNA: No  
679 longer nonsense: Known and putative roles of intron retention in normal and disease  
680 biology. *BioEssays* **38**, 41–49 (2016).
- 681 56. Mauger, O., Lemoine, F. & Scheiffele, P. Targeted Intron Retention and Excision for  
682 Rapid Gene Regulation in Response to Neuronal Activity. *Neuron* **92**, 1266–1278  
683 (2016).
- 684 57. Bentley, D. L. Coupling mRNA processing with transcription in time and space. *Nat.*  
685 *Rev. Genet.* **15**, 163–175 (2014).

- 686 58. Pfaffl, M. W. A new mathematical model for relative quantification in real-time RT-  
687 PCR. *Nucleic Acids Res.* **29**, e45 (2001).
- 688 59. Kim, D. *et al.* TopHat2: accurate alignment of transcriptomes in the presence of  
689 insertions, deletions and gene fusions. *Genome Biol.* **14**, R36 (2013).
- 690 60. Langmead, B. & Salzberg, S. L. Fast gapped-read alignment with Bowtie 2. *Nat.*  
691 *Methods* **9**, 357–359 (2012).
- 692 61. Anders, S., Pyl, P. T. & Huber, W. HTSeq—a Python framework to work with high-  
693 throughput sequencing data. *Bioinformatics* **31**, 166–169 (2015).
- 694 62. Robinson, M. D., McCarthy, D. J. & Smyth, G. K. edgeR: a Bioconductor package for  
695 differential expression analysis of digital gene expression data. *Bioinformatics* **26**,  
696 139–140 (2010).
- 697 63. Huang, D. W., Sherman, B. T. & Lempicki, R. A. Bioinformatics enrichment tools: paths  
698 toward the comprehensive functional analysis of large gene lists. *Nucleic Acids Res.*  
699 **37**, 1–13 (2009).
- 700 64. Huang, D. W., Sherman, B. T. & Lempicki, R. A. Systematic and integrative analysis of  
701 large gene lists using DAVID bioinformatics resources. *Nat. Protoc.* **4**, 44–57 (2009).
- 702 65. “A large-scale binding and functional map of human RNA-binding proteins | Nature.”  
703 <https://www.nature.com/articles/s41586-020-2077-3>.
- 704 66. Quinlan, A. R. & Hall, I. M. BEDTools: A flexible suite of utilities for comparing  
705 genomic features. *Bioinformatics* **26**, 841–842 (2010).
- 706 67. <https://www.r-project.org/>. “R: The R Project for Statistical Computing.”.  
707 <https://www.r-project.org/> <https://www.r-project.org/>.
- 708
- 709



710 **Figure legends**

711 **Figure 1 – Genome-wide analysis of AS during lung development reveals that most splicing**  
712 **changes occur at the perinatal period.**

713 A. Schematic representation of workflow: Mouse lungs at different developmental time-  
714 points were collected. RNA was extracted and gene expression and splicing analysis were  
715 performed by RNAseq.

716 B. Heatmap representing the K-means clustering of differentially AS events in at least one  
717 pair-wise comparison between time-points associated with genes that do not undergo  
718 differential gene expression in the same comparison (K=3). Cyan and coral represent  
719 decreased and increased PSI (percent spliced in), respectively, relative to the mean of each  
720 AS event across the time course (row z-score calculated from  $\text{logit}(\text{PSI})$ ). **Table S5** contains all  
721 AS events associated with each cluster.

722 C. AS dynamics of the three kinetic clusters represented by mean ratio (PSI) (bold line) and  
723 95% confidence interval (shaded area), data was centered in zero.

724 D. Enrichment of KEGG terms associated with DAS events associated with non-differentially  
725 expressed genes. **Table S6** contains the genes associated with term and associated statistics.

726

727 **Figure 2 – Candidate RBPs for the regulation of DAS between E18.5 and P5**

728 A. RBPs whose motifs are enriched in DAS events occurring in non-differentially expressed  
729 genes between E18.5 and P5. Red, enrichment in enhanced vs unregulated. Blue, enrichment  
730 in silenced vs unregulated. Gray, depletion in silenced/enhanced vs unregulated. Bold and  
731 underlined, RBPs whose motifs are enriched and that undergo differential gene expression  
732 between E18.5 and P5.

733 B. Heatmap representing gene expression changes of RBPs that undergo differential gene  
734 expression between E18.5 and P5 and whose motifs were enriched in the AS events. Blue and  
735 red represent decreased and increased gene expression, respectively, relative to the mean of  
736 each gene across the time course (row z-score calculated from  $\log_2(\text{CPMs}+1)$ ).

737 C. Venn diagram representing the overlap between the RBPs with enriched motifs in DAS  
738 events occurring in non-differentially expressed genes between E18.5 and P5 and those that  
739 undergo differential gene expression genes between E18.5 and P5

740

### 741 **Figure 3 – Identification of a novel *Vegfa* isoform – *Vegfa i5***

742 A. Left: RNAseq profile of *Vegfa* from bulk lung at different developmental time-points. Vast-  
743 TOOLS tracks representing previously annotated AS events associated with *Vegfa*.

744 Right: Higher magnification of the region containing intron 5 and exon 6

745 B. Schematic representation of the identified *Vegfa i5* isoform. Primer pairs used and size of  
746 the respective end-point PCR amplicons obtained is indicated. The alignment of sequenced  
747 PCR products with the predicted *Vegfa i5* isoform is represented on the bottom panel. Black  
748 bars represent full alignment of the sequence, white bars indicate no alignment. Poor  
749 sequencing quality at the ends of the sequenced fragments justifies the predominance of non-  
750 aligned sequences in these regions.

751 C. TBE-Urea PAGE gels of the *Vegfa i5* amplification products indicated in **Figure 3B**.

752

### 753 **Figure 4 – *Vegfa* isoforms are dynamically expressed during lung development**

754 A. Quantification of expression of *Vegfa* AS isoforms at different developmental time-points  
755 using Kallisto. TPM, transcripts per million. p-value from one-way ANOVA with Tukey  
756 correction for multiple testing. Data represented as mean  $\pm$  Max/Min.

757 B. Schematic representation of workflow: Bulk lungs at different developmental time-points  
758 were collected. RNA or protein were extracted. cDNA was produced from RNA. Expression  
759 analysis was performed by RT-qPCR. Analysis of the relative proportions between the  
760 expression of different isoforms was performed by end-point PCR and PAGE. Protein levels  
761 were quantified by ELISA.

762 C. Schematic representation of the *Vegfa* isoforms analysed in this study. Each exon is  
763 represented by a number and *i5* represents intron 5. Primer pairs used to amplify all *Vegfa*  
764 isoforms and each isoform individually in RT-qPCR or end-point PCR are indicated in the  
765 figure.

766 D. Expression changes of *Vegfa* isoforms from bulk lungs at different developmental time-  
767 points analysed by RT-qPCR. N=3 for each time-point. p-value from one-way ANOVA with  
768 Tukey correction for multiple testing.

769 E. Left: Representative TBE-Urea PAGE from PCR products obtained from cDNA samples from  
770 bulk lungs at different developmental time-points. Fragments were amplified using primer  
771 pair FX-RX. Bands represent *Vegfa 188*, *164* and *120* isoforms.

772 Right: Quantification of the normalized relative proportions between the expression levels of  
773 *Vegfa* isoforms on bulk lungs at different developmental time-points. N=3 for each time-  
774 point. p-value from chi-square test. TBE-Urea PAGE gels used for this quantification is  
775 represented in **Figure S5E**.

776 **Figure 5 – *Vegfa* isoforms are differentially expressed between CD31 SP and EpCAM SP**  
777 **populations during lung development**

778 A. Schematic representation of workflow: Cell suspensions from lungs at different  
779 developmental time-points were collected (pre-sort sample). Several lung cell populations  
780 were isolated by fluorescent-activated cell sorting (FACS). Samples were analysed for the  
781 expression of indicated surface markers (CD45, CD31, EpCAM). CD31 SP populations are  
782 enriched for endothelial cells, CD45 populations are enriched for immune cells, EpCAM SP  
783 populations are enriched for epithelial cells, Triple negative are enriched for mesenchymal  
784 cells. RNA was extracted from isolated cell populations and cDNA produced. Expression  
785 analysis was performed by RT-qPCR. Analysis of the relative proportions between the  
786 expression of different isoforms was performed by end-point PCR and PAGE. Alternatively,  
787 isolated cell populations were processed by cytospin and immunofluorescence (IF) was  
788 performed.

789 B. Representative FACS analysis plot from lung cell suspensions at P5. Dot plots represent cell  
790 populations from indicated gates. Live cells were gated using LiveDead Fixable Viability Dye.  
791 Percentages from indicated populations are represented.

792 C. Expression changes of total *Vegfa* from sorted cell populations at different developmental  
793 time-points analysed by RT-qPCR. Expression values normalized to E15.5 for each cell  
794 population. N=3 for each time-point. p-value from one-way ANOVA with Tukey correction for  
795 multiple testing.

796 D. Expression changes of *Vegfa* isoforms from CD31 SP cell population at different  
797 developmental time-points analysed by RT-qPCR. N=3 for each time-point except for E19.5.  
798 N=1 for E19.5. p-value from one-way ANOVA with Tukey correction for multiple testing.

799 E. Expression changes of *Vegfa* isoforms from EpCAM SP cell population at different  
800 developmental time-points analysed by RT-qPCR. N=3 for each time-point except for E19.5.  
801 N=1 for E19.5. p-value from one-way ANOVA with Tukey correction for multiple testing.

802 F. Representative TBE-Urea PAGE from PCR products obtained from cDNA samples from CD31  
803 SP and EpCAM SP cell population at different developmental time-points.

804 G: Quantification of the normalized relative proportions between the expression levels of  
805 *Vegfa* isoforms on CD31 SP and EpCAM SP cell population at different developmental time-  
806 points. N=3 for each time-point. p-value from chi-square test. TBE-Urea PAGE gels used for  
807 this quantification are represented in **Figure S6B-C**.

808

809 **Figure 6 – *Vegfa* undergoes alternative splicing towards *Vegfa 188* in epithelial AT1 during**  
810 **lung development**

811 A. Schematic representation of workflow: Cell suspensions from lungs at E18.5 and P5 were  
812 collected (pre-sort samples). Several lung cell populations were isolated by fluorescent-  
813 activated cell sorting. Samples were analysed for the expression of indicated surface markers  
814 (EpCAM, MHC II). EpCAM<sup>low</sup> MHC II<sup>-</sup> populations are enriched for AT1 cells, EpCAM<sup>high</sup> MHC II<sup>+</sup>  
815 populations are enriched for AT2 cells. RNA was extracted from isolated cell populations and  
816 cDNA produced. Expression analysis was performed by RT-qPCR. Analysis of the relative  
817 proportions between the expression of different isoforms was performed by end-point PCR  
818 and PAGE. Alternatively, isolated cell populations were processed by cytospin and  
819 immunofluorescence (IF) was performed.

820 B. Representative FACS analysis plot from lung cell suspensions at P5. Dot plots represent cell  
821 populations from indicated gates. Live cells were gated using LiveDead Fixable Viability Dye.  
822 Percentages from indicated populations are represented.

823 C. Expression changes of *Vegfa* isoforms from EpCAM SP, AT1 and AT2 cell population at P5  
824 were analysed by RT-qPCR. N=3 for each time-point. p-value from unpaired t-test.

825 D. Left: Representative TBE-Urea PAGE from PCR products obtained from cDNA samples from  
826 EpCAM SP, AT1 and AT2 cell populations at P5.

827 Right: Quantification of the normalized relative proportions between the expression levels of  
828 *Vegfa* isoforms on EpCAM SP, AT1 and AT2 cell populations at P5. N=3 for each time-point. p-  
829 value from chi-square test. TBE-Urea PAGE gels used for this quantification are represented  
830 in Figure S3F and S4E.

831 E. Expression changes of *Vegfa* isoforms from AT1 cell population at E18.5 and P5 were  
832 analysed by RT-qPCR. N=3 for each time-point. p-value from unpaired t-test.

833 F. Left: Representative TBE-Urea PAGE from PCR products obtained from cDNA samples from  
834 AT1 cell populations at E18.5 and P5.

835 Right: Quantification of the normalized relative proportions between the expression levels of  
836 *Vegfa* isoforms on AT1 cell populations at E18.5 and P5. N=3 for each time-point. p-value from  
837 chi-square test. TBE-Urea PAGE gels used for this quantification are represented in Figure S4E.

838

839 [Supplemental figure legends](#)

840 **Figure S1 – Analysis of RNAseq datasets from developing bulk mouse lungs**

841 A. Total number of reads and percentage of alignment per sample.

842 B. Heatmap representing gene expression changes of lung lineage-specific markers. Yellow  
843 and green represent increased and decreased gene expression, respectively, relative to the  
844 mean of each gene across the time course (row z-score calculated from  $\log_2(\text{CPMs}+1)$ ).

845 C. Venn diagrams representing the genes undergoing differential alternative splicing and/or  
846 differential gene expression in each pair-wise comparison between time-points associated.

847 D. Distribution of gene expression levels of genes undergoing differential AS in at least one  
848 pair-wise comparison between time-points. The 16 152 expressed genes expressed in the  
849 mouse developing lungs were grouped in 4 bins of equal size according to their absolute level  
850 of expression (CPMs) (low expression, medium-low expression, medium-high expression, and  
851 high expression). Then, the genes undergoing differential AS in at least one pairwise  
852 comparison between time-points were distributed within these bins.

853 E. Identification of the optimal number of clusters to use in K-means clustering of differentially  
854 AS events in at least one pair-wise comparison between time-points associated with non-  
855 differentially expressed genes in the same comparison using the average silhouette width  
856 method. The optimal number of clusters  $k$  is the one that maximizes the average silhouette,  
857 in this case  $K=2$ .

858 F. Heatmap representing the hierarchical clustering of differentially AS events in at least one  
859 pair-wise comparison between time-points associated with non-differentially expressed  
860 genes in the same comparison. Cyan and coral represent decreased and increased PSI  
861 (percent spliced in), respectively, relative to the mean of each AS event across the time course  
862 (row z-score calculated from  $\text{logit}(\text{PSI})$ ).

863

864

865 **Figure S2 – Candidate RBPs for the regulation of DAS between E18.5 and P5**

866 A. Left: Bar plots show the relative number of events with at least one motif hit for each RBP  
867 normalized by the total number of respective events.

868 Right: Density plots and cumulative density plots show the positional distribution of each RBP  
869 binding motif in regulated events against a background of unregulated events. These show  
870 where the motifs are more concentrated, and thus where the enrichment test was more  
871 significant (shaded area). Statistical significance was calculated using Matt  
872 test\_regexp\_enrich ( $p < 0.01$ ).

873 B. CLIP-seq signals at the genomic of the OGT represented as reads per kilobase million. The  
874 alternative splicing event is indicated in orange.

875

### 876 **Figure S3 – Analysis of *Vegfa* expression dynamics during lung development**

877 A. Quantification of *Vegfa* gene expression levels from bulk lung RNAseq at different  
878 developmental time-points. CPM, Counts per million. p-value from unpaired t-test.

879 B. Quantification of AS at different developmental time-points of a previously annotated  
880 alternatively spliced event of *Vegfa* associated with inclusion of exon 6 in Vast-TOOLS. The  
881 event is identified in **Figure 3A**. PSI, percent spliced-in. p-value from unpaired t-test.

882 C. Analysis in agarose gels of the RT-qPCR amplification products obtained using the primer  
883 pairs indicated in **Figure 4C**. The presence of a single band of the correct size indicates that  
884 these primers pairs are specific.

885 D. Expression changes of total *Vegfa* from bulk lungs at different developmental time-points  
886 analysed by RT-qPCR. N=3 for each time-point.



887 E. VEGFA protein levels in bulk lungs quantified by ELISA. N=3 for each time-point. p-value  
888 from one-way ANOVA with Tukey correction for multiple testing.

889 F. TBE-Urea PAGE gels used for the quantification of the normalized relative proportions  
890 between the expression levels of *Vegfa* isoforms on bulk lungs at different developmental  
891 time-points. N=3 for each time-point except for E19.5 (N=2).

892

### 893 **Figure S4 – Isolation of distinct lung cell populations**

894 A. Expression changes of cell type-specific markers from sorted cell populations at P5 by RT-  
895 qPCR. N=3 for each time-point. *Pecam1* (CD31) and *Cdh5* are markers for endothelial cells,  
896 *Prox1* is a marker for lymphatic endothelial cells, *Cd45* is a marker for immune cells, *Epcam*  
897 and *Cdh1* are markers for epithelial cells, *Aqp5* is a marker for epithelial AT1 cells, *Sftpc* is a  
898 marker for epithelial AT2 cells and *Foxj1* is a marker for epithelial ciliated cells. p-value from  
899 one-way ANOVA with Tukey correction for multiple testing.

900 B. Left: Immunofluorescence of CD31 (green) and ERG (red) in pre-sort and sorted CD31 SP  
901 populations at P5. Cell nuclei are labeled with DAPI (grey). Scale bar, 22  $\mu$ m.

902 Middle: Quantification of the percentage of CD31-positive cells in pre-sort and sorted CD31  
903 SP populations at P5. Data from three independent experiments with at least 500 cells  
904 quantified per condition. Data are shown as mean  $\pm$  SD. p-value from unpaired t-test.

905 Right: Quantification of the percentage of ERG-positive cells from CD31-positive cells in pre-  
906 sort and sorted CD31 SP populations at P5. Data from three independent experiments with at  
907 least 500 cells quantified per condition. Data are shown as mean  $\pm$  SD. p-value from unpaired  
908 t-test.

909 C. Left: Immunofluorescence of AQP5 (green) in pre-sort and sorted EpCAM SP populations  
910 at P5. Cell nuclei are labeled with DAPI (grey). Scale bar, 22  $\mu$ m.

911 Right: Quantification of the percentage of AQP5-positive cells in pre-sort and sorted EpCAM  
912 SP populations at P5. Data from three independent experiments with at least 500 cells  
913 quantified per condition. Data are shown as mean  $\pm$  SD. p-value from unpaired t-test.

914 D. Left: Immunofluorescence of SFTPC (green) in pre-sort and sorted EpCAM SP populations  
915 at P5. Cell nuclei are labeled with DAPI (grey). Scale bar, 22  $\mu$ m.

916 Right: Quantification of the percentage of SFTPC-positive cells in pre-sort and sorted EpCAM  
917 SP populations at P5. Data from three independent experiments with at least 500 cells  
918 quantified per condition. Data are shown as mean  $\pm$  SD. p-value from unpaired t-test.

919

920 **Figure S5- Analysis of *Vegfa* expression dynamics in distinct cell populations during lung**  
921 **development**

922 A. Expression changes of Total *Vegfa* from sorted cell populations at different developmental  
923 time-points analysed by RT-qPCR. Expression values normalized to E15.5 for CD45 SP  
924 population. N=3 for each time-point. p-value from two-way ANOVA with Tukey correction for  
925 multiple testing.

926 B. TBE-Urea PAGE gels used for the quantification of the normalized relative proportions  
927 between the expression levels of *Vegfa* isoforms on CD31 SP cell population at different  
928 developmental time-points. N=3 for each time-point.

929 C. TBE-Urea PAGE gels used for the quantification of the normalized relative proportions  
930 between the expression levels of *Vegfa* isoforms on EpCAM SP cell population at different  
931 developmental time-points. N=3 for each time-point except E19.5 (N=2).

932

933 **Figure S6 – Isolation of distinct alveolar epithelial cell populations**

934 A. Expression changes of cell type-specific markers from sorted cell populations at P5 by RT-  
935 qPCR. N=3 for each time-point. *Pecam1* (CD31) is a marker for endothelial cells, *Cd45* is a  
936 marker for immune cells, *Epcam* is a marker for epithelial cells. p-value from one-way ANOVA  
937 with Tukey correction for multiple testing.

938 B. Expression changes of cell type-specific markers from sorted cell populations at P5 by RT-  
939 qPCR. N=3 for each time-point. *Aqp5* is a marker for epithelial AT1 cells, *Sftpc* is a marker for  
940 epithelial AT2 cells and *Foxj1* is a marker for epithelial ciliated cells. p-value from one-way  
941 ANOVA with Tukey correction for multiple testing.

942 C. Left: Immunofluorescence of AQP5 (green) in EpCAM SP and sorted AT1 and AT2  
943 populations at P5. Cell nuclei are labelled with DAPI (grey). Scale bar, 22 um.

944 Right: Quantification of the percentage of AQP5-positive cells in EpCAM SP and sorted AT1  
945 and AT2 populations at P5. Data from three independent experiments with at least 500 cells  
946 quantified per condition. Data are shown as mean  $\pm$  SD. p-value from one-way ANOVA with  
947 Tukey correction for multiple testing.

948 D. Left: Immunofluorescence of SFTPC (green) in EpCAM SP and sorted AT1 and AT2  
949 populations at P5. Cell nuclei are labelled with DAPI (grey). Scale bar, 22 um.

950 Right: Quantification of the percentage of SFTPC-positive cells in EpCAM SP and sorted AT1  
951 and AT2 populations at P5. Data from three independent experiments with at least 500 cells  
952 quantified per condition. Data are shown as mean  $\pm$  SD. p-value from one-way ANOVA with  
953 Tukey correction for multiple testing.

954 E. TBE-Urea PAGE gels used for the quantification of the normalized relative proportions  
955 between the expression levels of *Vegfa* isoforms at E18.5 on AT1 and for AT1 and AT2 cell  
956 populations at P5. N=3 for each time-point.

957 F. Quantification of the FACS analysis of the fractions of EpCAM<sup>low</sup> MHC II<sup>-</sup> cells (AT1) within  
958 the EpCAM-positive population extracted from mouse lungs at E18.5 and P5. N=3 for each  
959 time-point. p-value from unpaired t-test.

960

961 [Supplemental tables](#)

962 **Table S1.** DAS events in at least one pairwise comparison between time-points, as calculated  
963 by Vast diff ( $|\Delta\text{PSI}| > 10\%$ , confidence interval 95%).

964 **Table S2.** Differentially expressed genes in at least one pairwise comparison between time-  
965 points, as calculated by EdgeR ( $|\log_2\text{FC}| > 1$ , FDR < 0.05).

966 **Table S3.** DAS events in at least one pairwise comparison between time-points associated  
967 with non-differentially expressed genes in the same comparison.

968 **Table S4.** DAS events in at least one pairwise comparison between time-points associated  
969 with differentially expressed genes in the same comparison.

970 **Table S5.** DAS events occurring in non-differentially expressed genes included in each kinetic  
971 cluster from K-means clustering and associated PSIs for each time-point.

972 **Table S6.** Enriched KEGG pathway terms for DAS events occurring in non-differentially  
973 expressed genes

974 **Table S7.** RNA-binding motifs enriched in DAS events occurring in non-differentially expressed  
975 genes between E18.5 and P5

976 **Table S8.** RBPs identified to undergo differential gene expression between E18.5 and P5.

977 **Table S9.** DAS events between E18.5 and P5 that do not undergo differential gene expression  
978 in this same time interval (DAS\_nonDEG) with enriched motifs for each differentially  
979 expressed RBP.

980 **Table S10.** DAS events between E18.5 and P5 that undergo differential gene expression in this  
981 same time interval (DAS\_DEG) with enriched motifs for each differentially expressed RBP.

982 **Table S11.** RBPs motifs enriched along Vegfa intron 5 sequence

983 **Materials and Methods**

984 **Key resources table**

| Reagent or Resource                                 | Source                   | Identifier    |
|-----------------------------------------------------|--------------------------|---------------|
| <b>Antibodies</b>                                   |                          |               |
| Rat anti-mouse APC CD31                             | BD Pharmingen            | 551262        |
| Mouse anti-mouse FITC CD45                          | Covance                  | 109806        |
| Rat anti-mouse PE CD326 (Ep-CAM)                    | Covance                  | 118206        |
| Rat anti-mouse PerCP/Cy5.5 MHC II                   | Biologend                | 107626        |
| Pro-SFPTC, Rabbit                                   | SevenHills BioReagents   | WRAB-9337     |
| CD31 (PECAM1), Goat                                 | R&D                      | AF3628        |
| Aquaporin 5, Rabbit                                 | Merck                    | 178615        |
| ERG, Rabbit                                         | Abcam                    | ab92513       |
| Donkey anti-Rabbit Alexa 568                        | Thermo Fisher Scientific | A10042        |
| Donkey anti-goat Alexa 647                          | Thermo Fisher Scientific | A21447        |
| <b>Chemicals, Peptides and Recombinant Proteins</b> |                          |               |
| PBS                                                 | Sigma-Aldrich            | P4417         |
| Dulbecco's Modified Eagle Medium (DMEM)             | Gibco                    | 11320-074     |
| Albumin Bovine Fraction V (BSA)                     | Nzytech                  | MB04602       |
| RNase-OFF                                           | Enzifarma                | 9037          |
| Liberase™ Research Grade                            | Roche                    | 5401119001    |
| DNase I, grade II, from bovine pancreas             | Roche                    | 10104159001   |
| Ethylenediaminetetra-acetic acid (EDTA)             | VWR                      | VWRC20301.290 |
| RBC lysis buffer 10x                                | Biologend                | 420301        |
| RNase-free water                                    | Sigma-Aldrich            | 3098          |
| Trypan Blue                                         | Sigma-Aldrich            | T8154         |
| Live/Dead Fixable Near-IR Dead cell Stain kit       | Invitrogen               | LTI L10119    |
| Hepes                                               | Sigma-Aldrich            | H3375-250G    |
| TRIzol™ Reagent                                     | Alfagene/Ambion          | 15596026      |
| Chloroform                                          | Merck Millipore          | 1.02445.1000  |
| Glycogen                                            | Sigma                    | G1767-1VL     |
| 3M Sodium Acetate                                   | VWR                      | 27653,26      |
| Ethanol Absolute                                    | VWR                      | 20821,33      |
| Phenol-Chloroform-Isoamyl alcohol (25:24:1)         | Sigma                    | P2069         |
| Isopropanol                                         | VWR                      | 1.09634.1000  |

|                                                       |                            |                                                                                               |
|-------------------------------------------------------|----------------------------|-----------------------------------------------------------------------------------------------|
| Power SYBR® Green PCR Master Mix                      | Thermo Fisher sci          | 4368706                                                                                       |
| Tris base                                             | Nzytech                    | MB01601                                                                                       |
| Agarose                                               | Nzytech                    | MB14402                                                                                       |
| GreenSafe Premium                                     | Nzytech                    | MB13201                                                                                       |
| DNA Gel Loading Dye (6X)                              | Thermo                     | R0611                                                                                         |
| GeneRuler 1Kb Plus DNA ladder                         | Thermo Scientific          | SM1333                                                                                        |
| GeneRuler 100 bp DNA Ladder                           | Thermo                     | SM0241                                                                                        |
| Urea                                                  | Sigma-Aldrich              | U5378                                                                                         |
| Ammonium Persulfate                                   | Sigma                      | A3678-25G                                                                                     |
| Ficoll 400                                            | Enzymatic                  | BP525-25                                                                                      |
| Sodium chloride                                       | VWR                        | 27810,295                                                                                     |
| Triton X-100                                          | Sigma-Aldrich              | T8787                                                                                         |
| Dithiothreitol (DTT)                                  | Enzo Life Sciences         | ALX 280 001 G010                                                                              |
| Halt™ Protease and Phosphatase Inhibitor Cocktail     | Thermo                     | 78446                                                                                         |
| Acrylamide/bis-Acrylamide (29:1 solution)             | Nzytech                    | MB04501                                                                                       |
| Hydrochloric acid                                     | VWR                        | 20252,335                                                                                     |
| N,N,N',N'-TETRAMETHYLETHYLENEDIAMINE                  | Sigma                      | T9281-25ML                                                                                    |
| Bromophenol Blue                                      | Merck                      | 108122                                                                                        |
| RNeasy Plus Mini kit                                  | Qiagen                     | 50974136                                                                                      |
| RNeasy Plus Micro kit                                 | Qiagen                     | 50974034                                                                                      |
| DNase I recombinant, RNase-free                       | Roche                      | 4716728001                                                                                    |
| High Capacity RNA-to-cDNA Kit                         | Applied Biosystems         | LTAB 4387406                                                                                  |
| Q5 Hot Start High-Fidelity DNA Polymerase             | BioLabs                    | M0493S                                                                                        |
| Wizard® SV Gel and PCR Clean-Up System                | Promega                    | A9281                                                                                         |
| Pierce™ BCA Protein Assay Kit                         | Thermo Scientific          | 23227                                                                                         |
| Mouse VEGFA Quantikine® Elisa kit                     | R&D                        | MMV00                                                                                         |
| <b>Experimental Models: Organisms</b>                 |                            |                                                                                               |
| C57Bl/6J mice ( <i>Mus musculus</i> Linnaeus)         | Charles River Laboratoires | N/A                                                                                           |
| <b>Oligonucleotides</b>                               |                            |                                                                                               |
| Primers used in PCR are listed in the methods section | Sigma-Aldrich              | This manuscript                                                                               |
| <b>Bioinformatics tools and softwares</b>             |                            |                                                                                               |
| Kallisto                                              |                            | <a href="https://github.com/pachterlab/kallisto">https://github.com/pachterlab/kallisto</a>   |
| VastDB                                                |                            | <a href="https://vastdb.crg.eu/wiki/Main_Page">https://vastdb.crg.eu/wiki/Main_Page</a>       |
| VAST-TOOLS                                            |                            | <a href="https://github.com/vastgroup/vast-tools">https://github.com/vastgroup/vast-tools</a> |
| Matt                                                  |                            | <a href="http://matt.crg.eu/">http://matt.crg.eu/</a>                                         |
| DAVID                                                 |                            | <a href="https://david.ncifcrf.gov/tools.jsp">https://david.ncifcrf.gov/tools.jsp</a>         |

|                                     |                                   |                                                                                                                       |
|-------------------------------------|-----------------------------------|-----------------------------------------------------------------------------------------------------------------------|
| QuantStudio™ Real-time PCR Software | Applied Biosystems                | 4486400                                                                                                               |
| Prism 8 Software                    | GraphPad                          | <a href="https://www.graphpad.com/scientific-software/prism/">https://www.graphpad.com/scientific-software/prism/</a> |
| Image Lab™ Software                 | BioRad                            | 1709690                                                                                                               |
| SnapGene® Software                  | GSL Biotech                       | <a href="https://www.snapgene.com">https://www.snapgene.com</a>                                                       |
| FLOW JO Software                    | BD Life Sciences                  | <a href="https://www.flowjo.com/">https://www.flowjo.com/</a>                                                         |
| ZEN software (black edition)        | Carl Zeiss                        | N/A                                                                                                                   |
| ImageJ Software                     | NIH                               | <a href="https://imagej.nih.gov/">https://imagej.nih.gov/</a>                                                         |
| Microsoft Excel 2013                | Office                            | N/A                                                                                                                   |
| <b>Others</b>                       |                                   |                                                                                                                       |
| <b>Sanger Sequencing</b>            | Eurofins  genomics /GATC services | N/A                                                                                                                   |

985

## 986 **Mice and sample collection**

987 Wild-type C57Bl/6 mice (*Mus musculus Linnaeus*) were used in this study and were  
988 maintained under normal husbandry conditions at the Instituto de Medicina Molecular (iMM)  
989 and under national regulations. Animal procedures were performed under the DGAV project  
990 license 0421/000/000/2016. Both female and male mice were used for sample collection.

991 Timed matings were performed and mouse lungs were collected at different time-points  
992 (E17.5, E18, E18.5, E19, E19+2h, E19.5, P0, P0+2h, P2 and P8) for different procedures.  
993 Biological replicates of each time-point were collected from the same litter.

## 994 **RNA extraction from bulk lungs**

995 Immediately after isolation, lungs were transferred to an Eppendorf, snap frozen in liquid  
996 nitrogen and stored at -80°C. The lungs were thawed and mechanically disrupted using a  
997 pestle. To extract and purify RNA, we used the RNeasy Plus Mini Kit (Qiagen), following  
998 manufacturers' instructions. For further dissociation of the tissue, after RLT plus lysis buffer  
999 addition, we used the pestle and a 20G needle in a 3 mL syringe (passing the tissue roughly  
1000 10 times). RNA concentration was measured using Thermo Scientific™ NanoDrop 2000. A



1001 fraction of the purified RNA was used to produce cDNA and the remaining volume of RNA was  
1002 stored at -80°C.

### 1003 **Lung tissue dissociation and FACS**

1004 For cell sorting, the lungs were collected and transferred to a 50 mL falcon with 1 mL of cold  
1005 (+4°C) Dulbecco's Modified Eagle Medium (DMEM) supplemented with 1% Bovine Serum  
1006 Albumin (BSA). Disruption of the tissue was performed on ice using sterile scissors and a  
1007 sterile scalpel blade until no clear tissue pieces were visible. The dissociated lung tissue was  
1008 incubated with 2 mL of Liberase (200 µg/mL) and DNase I (10 µg/mL) in DMEM + 1% of BSA  
1009 in an Eppendorf tube and incubated in a rotator for 40 min at 37°C. During this enzymatic  
1010 digestion period, the tissue was further disrupted mechanically by passing 4 times through a  
1011 20G needle attached to a 2 mL syringe. We added 2 mL of cold FACS buffer (EDTA 1 mM, BSA  
1012 0.5%, dPBS 1x) and aspirated the suspension into a 10 mL syringe with a 20G needle attached.  
1013 Cell suspension was forced to pass through a 70 µm cell strainer. We centrifuged the samples  
1014 at 200 x g for 5 min at 4°C. The supernatant was discarded. To lyse red blood cells (RBC), each  
1015 pelleted lung was re-suspended in 1 mL of RBC lysis buffer 1x and incubated for 5 min at RT.  
1016 Cell suspension was forced to pass through a 40 µm cell strainer. The number of cells was  
1017 counted and the cell suspension was centrifuged at 200 x g for 5 min at 4°C. The pelleted cells  
1018 were re-suspended in FACS buffer to a density of  $16 \times 10^6$  cells/mL. Incubation with antibodies  
1019 and LiveDead Fixable Viability dye (L/D) was performed for 20 min in the dark at +4°C in the  
1020 following dilutions: Live/Dead APC-Cy7 (1:2000); Rat anti-mouse APC CD31 (1:100); Mouse  
1021 anti-mouse FITC CD45 (1:200); Rat anti-mouse PE CD326 (Ep-CAM) (1:100); and Rat anti-  
1022 mouse PerCP/Cy5.5 MHC II (1:500). Single color and unstained controls were used to set up  
1023 the gatings.

1024 After antibody incubation, cells were centrifuged at 300 x g for 5 min at 4°C and washed by  
1025 re-suspending in FACS buffer to a concentration of  $1 \times 10^6$  cells/200  $\mu$ L and centrifugation at  
1026 300 x g for 5 min at 4°C. Finally, pelleted cells were re-suspended in FACS buffer to a final  
1027 concentration of  $1 \times 10^6$  cells/250  $\mu$ L for the single colors, and unstained fraction, and  $8 \times 10^6$   
1028 cells/mL for the fraction to be sorted. FACS was performed in BD FACSAria III cell sorter with  
1029 a nozzle of 100  $\mu$ m and a pressure of 20 PSI. Dead cells were excluded using LiveDead Fixable  
1030 Viability dye. We collected different cell populations, in RNase-free Eppendorf tubes filled  
1031 with 500  $\mu$ L of collection buffer (Hepes 25 mM, BSA 2.5% in DMEM) and centrifuged at 2400  
1032 x g for 5 min at 4°C. The supernatant was discarded and the pellet was re-suspended in 1 mL  
1033 of Trizol Reagent by pipetting up and down several times vortexed for 1 min. After  
1034 homogenization, cells were incubated at RT for 5 min to allow the complete dissociation of  
1035 nucleoprotein complexes. Cell lysates were stored at -80°C until RNA extraction of sorted cells  
1036 was performed.

### 1037 **RNA extraction from sorted cells**

1038 The samples in Trizol were thawed on ice and incubated at RT for 5 min. 200  $\mu$ L of chloroform  
1039 was added to each Eppendorf. The tubes were shaken by hand for 30 sec and incubated at RT  
1040 for 5 min. After incubation, the tubes were centrifuged at 12 000 x g for 15 min at 4°C. The  
1041 upper aqueous phase was carefully transferred to a new RNase-free Eppendorf tube. To  
1042 precipitate and wash RNA, 1.5  $\mu$ L of glycogen and 50  $\mu$ L of 3M sodium acetate were added to  
1043 each tube. Tubes were briefly vortexed and 500  $\mu$ L of isopropanol was added. The eppendorfs  
1044 were vortexed and incubated at RT for 15 min and centrifuged at 12 000 x g for 8 min at 4°C.  
1045 The supernatants were discarded and the pellets were washed with 1 mL of 75% ethanol. The  
1046 tubes were centrifuged at 12 000 x g for 5 min at 4°C and the supernatant was carefully  
1047 discarded after centrifugation. The pellets were allowed to dry at RT and were resuspended

1048 in 20  $\mu$ L of RNase-free water. After suspension, all samples were kept on ice and RNA was  
1049 quantified using Thermo Scientific™ NanoDrop 2000. Samples were treated with recombinant  
1050 DNase I (RNase-free). For each reaction 5  $\mu$ L of DNase I buffer, 1  $\mu$ L of DNase I and 24  $\mu$ L of  
1051 RNase-free water were added to 20  $\mu$ L of RNA (up to 10  $\mu$ g) from each sample making a final  
1052 volume of 50  $\mu$ L per reaction and incubated for 20 min at 30°C. To inactivate DNase I and  
1053 purify the RNA, we added 1 volume of phenol-chloroform-isoamyl alcohol mixture (25:24:1).  
1054 The tubes were vortexed and centrifuged at 12 000 x g for 10 min at 4°C. The upper aqueous  
1055 phase was transferred to a new RNase-free Eppendorf tube. 1 volume of chloroform was  
1056 added to each sample, the samples were then vortexed and centrifuged at 12 000 x g for 10  
1057 min at 4°C. The upper aqueous phase was transferred to a new RNase-free Eppendorf. To  
1058 precipitate RNA, we added 1.5  $\mu$ L of glycogen and 50  $\mu$ L of 3M sodium acetate to each tube  
1059 and vortexed them. 500  $\mu$ L of isopropanol was added, the tubes were vortexed and incubated  
1060 at RT for 15 min. After incubation, the tubes were centrifuged at 12 000 x g for 20 min at 4°C  
1061 to precipitate RNA and the supernatant was discarded. To wash the pellets, we added 1 mL  
1062 of 75% ethanol and centrifuged the tubes at 12 000 x g for 5 min at 4°C. We discarded the  
1063 supernatant carefully and repeated this step once to further wash the RNA. Pellets were dried  
1064 at RT and re-suspended it in 15  $\mu$ L of RNase-free water. Each sample was kept on ice and  
1065 quantified using Thermo Scientific™ NanoDrop 2000. A fraction of the purified RNA was used  
1066 to produce cDNA and the remaining volume of RNA was stored at -80°C.

#### 1067 **Production of cDNA**

1068 Production of cDNA from RNA extracted from both bulk lungs and sorted cells was performed  
1069 using the High-Capacity RNA-to-cDNA™ Kit (Applied Biosystems™), following the  
1070 manufacturers' protocol. The cDNA was then stored at -20°C and used for end-point PCR and  
1071 RT-qPCR reactions.

## 1072 **End-point Polymerase Chain Reaction (PCR)**

1073 Specific target regions were amplified through standard end-point PCR. Primers used to  
1074 amplify the distinct *Vegfa* isoforms through end-point PCR are presented in the table below.  
1075 PCR was performed using Q5 Hot Start High-Fidelity DNA Polymerase. To perform each  
1076 reaction we added: 10  $\mu$ L of 5X Q5 Reaction Buffer, 1  $\mu$ L of dNTPs (10 mM), 2.5  $\mu$ L of Forward  
1077 Primer (10  $\mu$ M), 2.5  $\mu$ L of Reverse Primer (10  $\mu$ M), 0.5  $\mu$ L of Q5 Hot Start HighFidelity DNA  
1078 Polymerase, cDNA as template and Nuclease-Free water up to 50  $\mu$ L. PCR was run on T100™  
1079 Thermal Cycler (Bio-Rad) using the following PCR program: an initial denaturation step of 98°C  
1080 for 30 secs, 26 cycles of 10 sec at 98°C, 30 sec at 65°C and 2 min at 72°C, followed by a final  
1081 extension of 2 min at 72°C. PCR products were analysed by performing electrophoresis in a  
1082 2% agarose gel or in a TBE-UREA-Polyacrylamide gel as described below.

## 1083 **Primers used in standard end-point PCR**

| Target                    | Sequence                                      | Reference       |
|---------------------------|-----------------------------------------------|-----------------|
| <i>Vegfa</i> (E3/E4)      | <b>F1: 5' – CGACAGAAGGAGAGCAGAAGT – 3'</b>    | This manuscript |
|                           | <b>R1: 5' – ACTCCAGGGCTTCATCGTTA – 3'</b>     |                 |
| Universal <i>Vegfa</i>    | <b>F2: 5' – CCGAAACCATGAACTTTCTGC – 3'</b>    | This manuscript |
|                           | <b>R2: 5' – GGATTAAGGACTGTTCTGTCAACG – 3'</b> |                 |
| <i>Vegfa</i> Intron 5 (a) | <b>F2: 5' – CCGAAACCATGAACTTTCTGC – 3'</b>    | This manuscript |
|                           | <b>R3: 5' – CCTTCACTGCACGTTTAGACC – 3'</b>    |                 |
| <i>Vegfa</i> Intron 5 (b) | <b>F3: 5' – GGAAGGTCAGTTTAGGACGG – 3'</b>     | This manuscript |
|                           | <b>R2: 5' – GGATTAAGGACTGTTCTGTCAACG – 3'</b> |                 |

1084

1085

## 1086 **PCR product purification and Sanger sequencing**

1087 To sequence the *Vegfa* isoform comprising intron 5, several overlapping sequences were  
1088 obtained in a standard end-point PCR reaction. From the total volume of PCR product, we  
1089 saved a fraction (10  $\mu$ L) to run on a 2% agarose gel to confirm if the amplification of each

1090 fragment was successful. The remaining volume in the tube (40  $\mu$ L) was purified using the  
 1091 Wizard® SV Gel and PCR Clean-Up System (Promega) following the manufacturers' protocol.  
 1092 DNA Sanger Sequencing was performed by GATC services (Eurofins|genomics). DNA  
 1093 sequences obtained from the sequencing results of fragments amplified from *Vegfa intron 5*  
 1094 (FASTA file) were imported into the SnapGene® software (GSL Biotech).

#### 1095 **Gene expression analysis using real-time quantitative PCR (RT-qPCR)**

1096 Quantitative gene expression analysis was performed by RT-qPCR using intron-spanning  
 1097 primer pairs. Two housekeeping genes, *Actb* and *Gusb*, were analysed as housekeeping genes.  
 1098 All primers used for RT-qPCR are indicated in the table below. A standard curve for each  
 1099 primer pair was obtained in every RT-qPCR run alongside with the samples to be analysed. To  
 1100 obtain the standard curve, we mixed cDNA from all time-points collected and prepared  
 1101 different dilutions (1:10, 1:100, 1:500, 1:1000).

#### 1102 **Primers used in RT-qPCR**

| Gene                  | Sequence                                             | Reference       |
|-----------------------|------------------------------------------------------|-----------------|
| <i>Actb</i>           | <b>F: 5'</b> – CACCCGCGAGCACAGCTTCT – <b>3'</b>      | This manuscript |
|                       | <b>R: 5'</b> – CGTTGTCGACGACCAGCGCA – <b>3'</b>      |                 |
| <i>Gusb</i>           | <b>F: 5'</b> – AACCTCTGGTGGCCTTACCT – <b>3'</b>      | This manuscript |
|                       | <b>R: 5'</b> – TCAGTTGTTGTCACCTTCACCT – <b>3'</b>    |                 |
| <i>Vegfa 120</i>      | <b>F4: 5'</b> – GCCAGCACATAGGAGAGATGAGC – <b>3'</b>  | This manuscript |
|                       | <b>R4: 5'</b> – GGCTTGTCACATTTTTCTGGC – <b>3'</b>    |                 |
| <i>Vegfa 164</i>      | <b>F4: 5'</b> – GCCAGCACATAGGAGAGATGAGC – <b>3'</b>  | This manuscript |
|                       | <b>R5: 5'</b> – CAAGGCTCACAGTGATTTTTCTGG – <b>3'</b> |                 |
| <i>Vegfa 188</i>      | <b>F4: 5'</b> – GCCAGCACATAGGAGAGATGAGC – <b>3'</b>  | This manuscript |
|                       | <b>R6: 5'</b> – AACCAAGGCTCACAGTGAACGCT – <b>3'</b>  |                 |
| <i>Vegfa Intron 5</i> | <b>F5: 5'</b> – CAGATGTGAATGCAGACCAA – <b>3'</b>     | This manuscript |
|                       | <b>R7: 5'</b> – ACCCAAGAGAGGAAGCAAGA – <b>3'</b>     |                 |
| <i>Total Vegfa</i>    | <b>F1: 5'</b> – CGACAGAAGGAGAGCAGAAGT – <b>3'</b>    | This manuscript |
|                       | <b>R1: 5'</b> – ACTCCAGGGCTTCATCGTTA – <b>3'</b>     |                 |
| <i>CD31</i>           | <b>F: 5'</b> – ACACCTGCAAAGTGGAAATCA – <b>3'</b>     | This manuscript |
|                       | <b>R: 5'</b> – CTGGATGGTGAAGTTGGCTA – <b>3'</b>      |                 |
| <i>CD45</i>           | <b>F: 5'</b> – GGGTTGTTCTGTGCCTTGTT – <b>3'</b>      | This manuscript |
|                       | <b>R: 5'</b> – CTGGACGGACACAGTTAGCA – <b>3'</b>      |                 |

|              |                                               |                 |
|--------------|-----------------------------------------------|-----------------|
| <i>EpCam</i> | <b>F: 5' – TGTCATTTGCTCCAAACTGG – 3'</b>      | This manuscript |
|              | <b>R: 5' – GTCGTACAGCCCATCGTTGT – 3'</b>      |                 |
| <i>Aqp5</i>  | <b>F: 5' – CCGAGCCATCTTCTACGTG – 3'</b>       | This manuscript |
|              | <b>R: 5' – TGGTGTGTGTTGTTGCTGA – 3'</b>       |                 |
| <i>Sfptc</i> | <b>F: 5' – ATGGACATGAGTAGCAAAGAGG – 3'</b>    | This manuscript |
|              | <b>R: 5' – GATGAGAAGGCGTTTGAGGT – 3'</b>      |                 |
| <i>Foxj1</i> | <b>F: 5' – GAGCTGGGGACAGAGAACC – 3'</b>       | This manuscript |
|              | <b>R: 5' – CTCCTCCGAACACGAATGT – 3'</b>       |                 |
| <i>Prox1</i> | <b>F: 5' – AGAGAGAGAGAAAGAGAGAGAGTGG – 3'</b> | This manuscript |
|              | <b>R: 5' – TGGGCACAGCTCAAGAATC – 3'</b>       |                 |
| <i>Cdh5</i>  | <b>F: 5' – GAACGAGGACAGCAACTTCACC – 3'</b>    | This manuscript |
|              | <b>R: 5' – GTTAGCGTGCTGGTTCCAGTCA – 3'</b>    |                 |
| <i>Cdh1</i>  | <b>F: 5' – TGCCACCAGATGATGATACC – 3'</b>      | This manuscript |
|              | <b>R: 5' – GCTGGCTCAAATCAAAGTCC – 3'</b>      |                 |

1103

1104 Additionally, in each plate we used a calibrator sample. The calibrator sample, which was  
 1105 prepared once and used in every plate, was generated by mixing equal quantities of each  
 1106 cDNA sample (all time-points) from bulk lungs (1:200). For each individual reaction we added:  
 1107 7  $\mu$ L of Power SYBR<sup>®</sup> Green PCR Master Mix, 0.3  $\mu$ L of previously diluted primer pairs (final  
 1108 concentration of 100 nM), 2  $\mu$ L of diluted cDNA and 4.85  $\mu$ L of RNase-free water resulting in  
 1109 a final volume of 14  $\mu$ L per well. We used Applied Biosystems VIIA 7 Real-Time PCR system,  
 1110 the conditions for the reaction were: 1x 50°C for 2 min, 95°C for 10 min; 45x 95°C for 15  
 1111 sec, 60°C for 1 min, 1x 95°C for 15 sec, 60°C for 1 min; and 1x 95°C for 15 sec. The software  
 1112 used to analyze each RT-qPCR experiment was QuantStudio™ Real-time PCR Software  
 1113 (Applied Biosystems). Standard curves, Melting curve and amplification plots were all  
 1114 generated in this software. Pfaffl method<sup>58</sup> was used to quantify gene expression. To avoid  
 1115 inter-plate variations when we needed to compare between different plates, we used an  
 1116 adaptation of the method used in qbase+ software (Biogazelle) that allows relative  
 1117 quantification of gene expression through a modified method based on  $\Delta\Delta$ Ct and through the  
 1118 normalization to a calibrator sample (Calibrated Normalized Relative Quantity, CNRQ). All  
 1119 graphics presented were elaborated with Graph Pad Prism 8 software.

1120 **TBE-Urea-Polyacrylamide gel electrophoresis (PAGE)**

1121 6% of TBE-Urea-Polyacrylamide gels were prepared by using: 1.5 mL of 10x TBE Buffer, 2.25  
1122 mL of 40% polyacrylamide/bisacrylamide reagent, 7.2 g of Urea and ddH<sub>2</sub>O up to 15 mL. After  
1123 completely dissolving the urea, we added 15 µL of TEMED and 150 µL of fresh 10% (w/v) APS.  
1124 The mixture was poured into a 15mm-thick gel support and a 15-well comb was inserted.  
1125 After polymerization, we mounted the gels in an electrophoresis apparatus filled with 1x TBE  
1126 buffer. Before loading the samples, urea traces and gel pieces were washed from the wells  
1127 with 1x TBE Buffer and the gel was pre-ran for 30 min at 25V. We loaded 30 µL of sample in  
1128 each well - 15 µL of PCR product diluted in 15 µL of homemade 2x TBE-Urea sample buffer  
1129 (10% 10x TBE running Buffer; 6% Ficoll Type 400; 1% bromophenol blue; 7M Urea). The gel  
1130 was run at 25V until the samples moved past the loading space into the gel, after which the  
1131 voltage to 100V was increased. After running, the gel was incubated in 1x TBE for 10 min and  
1132 after was stained with Green Safe reagent dye (5 µL /100 mL of TBE 1x) for 30 min and  
1133 visualized on ChemiDoc XRS+ system (BioRad).

1134

1135 **Cytospin and immunofluorescence**

1136 Single cell suspension from lungs at P5 before sorting (pre-sort sample) and after sorting were  
1137 used in cytopsin<sup>40</sup>. 80 000 -100 000 cells/ 200 uL FACS buffer were used per slide. Samples  
1138 were centrifuged in Shandon Cytospin 2 for 5 min at 500 g. The resultant slide was fixed with  
1139 4% PFA for 10 min at RT, washed twice in PBS and stored in PBS 0.01% Azide at +4°C until  
1140 further use.

1141 Immunostaining was performed in cytopsin slides (all steps at RT). Slides were blocked in  
1142 3%BSA 0.1% triton X-100 in PBS (PBST-BSA) for 30 min. Primary antibody incubation was  
1143 performed in PBST-BSA for 2 hours. Slides were washed three times in PBS 0.1% Triton X-100

1144 (PBST). Secondary antibody incubation was performed in PBST-BSA for 1h. Slides were  
1145 washed three times in PBST. Nuclei were stained with DAPI for 5 min. Slides were washed  
1146 once with PBS and mounted in Mowiol/Dabco mixture. Imaging was performed with a 40x EC  
1147 Plan-Neofluar DIC objective. Image analysis was performed with Fiji software.

1148 The antibodies used in immunofluorescence were: Rabbit Pro-SFPTC (SevenHills BioReagents,  
1149 1:1000), Goat CD31 (PECAM1) (R&D, 1:400), Rabbit Aquaporin 5 (Merck, 1:200), Rabbit ERG  
1150 (Abcam, 1:200), Donkey anti-Rabbit Alexa 568 (Thermo Fisher Scientific, 1:500), and Donkey  
1151 anti-goat Alexa 647 (Thermo Fisher Scientific, 1:500)

## 1152 **ELISA**

1153 After collection, lungs were snap-frozen in liquid nitrogen. We added cold lysis buffer (150  
1154 mM NaCl; 1 mM EDTA; 50 mM Tris-HCl pH=7.4; 1% Triton X-100 diluted in ddH<sub>2</sub>O and  
1155 supplemented with 1 mM DTT and proteinase and phosphatase inhibitors (Thermo Scientific,  
1156 1861282) to the tube with the frozen lungs. Volume of lysis buffer was adjusted according to  
1157 lung size (500  $\mu$ L/150 mg). To mechanically disrupt the tissue, we used a pestle and pipetted  
1158 up and down. We incubated the mixture on ice for 15 min and centrifuged at maximum speed  
1159 for 15 min at +4°C. We transferred the supernatant to a new ice-cold tube. To quantify protein  
1160 concentration, we used the Pierce BCA Protein assay kit following the manufacturers'  
1161 protocol. For analysis of VEGFA protein levels, we used the Mouse VEGF Quantikine ELISA Kit  
1162 (R&D, MMV00), following the manufacturers' protocol.

1163

## 1164 **RNAseq and bioinformatics analysis**

### 1165 **RNA isolation and sequencing library preparation**



1166 We performed RNAseq using mouse lung at 4 developmental stages (E15.5, E18.5, P5 and P8)  
1167 in triplicates. After RNA extraction, RNA integrity was evaluated in Fragment Analyzer and all  
1168 RNA samples revealed to have RNA quality number (RQN) >9.8. Library preparation was  
1169 performed by using Truseq RNA Library protocols. Samples were barcoded, pooled and  
1170 redistributed into 3 lanes. RNA sequencing was performed using HiSeq 4000 sequencing  
1171 platform. In total, we obtained 897 million paired-end (PE) 101 nt reads (59.8 million per  
1172 sample on average) (**Figure S1A**). The RNAseq data has been deposited into the NCBI Gene  
1173 Expression Omnibus (<https://www.ncbi.nlm.nih.gov/geo/>) under the accession number  
1174 GSE175403.

#### 1175 **RNAseq data alignment and differential gene expression**

1176 The ~56.8 M raw reads generated per sample were uniquely mapped to the mm10 assembly  
1177 and annotated to the Gencode vM14 transcriptome using TopHat2 (version 2.1.1)<sup>59</sup>, with  
1178 Bowtie2 (version 2.3.4)<sup>60</sup>.

1179 For gene expression analysis, gene expression levels were quantified with HTSeq-count  
1180 (version 0.10.0)<sup>61</sup>. Data preprocessing was done in R, using limma and edgeR packages, as  
1181 follows: genes were removed when weakly expressed or associated to noninformative  
1182 features ("no\_feature", "ambiguous", "too\_low\_aQual", "not\_aligned",  
1183 "alignment\_not\_unique"); and for features without as least 1 read per million in 3 of the  
1184 samples (minimum number of replicates). After applying these quality criteria, we obtained  
1185 16 152 expressed genes for downstream analysis. The counts per gene were normalized to  
1186 counts per million (CPMs) by dividing it by the total number of mapped reads per sample and  
1187 multiplying by 10<sup>6</sup>. The CPM normalized data were then transformed with log<sub>2</sub> using an  
1188 offset of 1. Pairwise analysis of differential gene expression was performed using the  
1189 generalized linear model workflow<sup>62</sup> and the cutoffs  $|\log_2(\text{FC})| > 1$  and  $\text{FDR} < 0.05$ . Row z-

1190 scores for each gene represented in the heatmaps were calculated using  $\log_2(\text{CPMs}+1)$  values  
1191 and using heatmap.2 function from gplots package in R.

### 1192 **Alternative splicing analysis**

1193 For AS event-level analysis, raw reads were mapped to previously annotated AS events for  
1194 the mouse reference assembly (mm10 vastdb.mm2.23.06.20) from VastDB (VastDB v2  
1195 released). Abundance of AS events in percent spliced in (PSI) values was estimated using  
1196 VAST-TOOLS (version 2.5.1) *align* and *combine* commands <sup>28,29</sup>.

1197 AS events in which the read coverage based on corrected reads (quality score 2) does not  
1198 meet the minimum threshold (N) and those in which PSI could not be determined (NA) in at  
1199 least 1 sample, and those in which minimum number of reads < 10 in at least 3 samples were  
1200 excluded from subsequent analysis. To calculate differential AS between each pair of time-  
1201 points for the AS events, we used Vast-tools *diff* command. Vast *diff* uses Bayesian inference  
1202 followed by differential analysis to calculate  $\Delta\text{PSI}$  and minimum value difference (MV)  
1203 between 2 samples for each AS event. We used a confidence interval of 95%,  $\text{MV} \geq 10\%$  (**Table**  
1204 **S1**). After these criteria, we obtained 460 events identified as being differentially AS in at least  
1205 one pairwise comparison between time-points, associated with 355 genes.

1206 To analyse the expression levels of genes undergoing differential AS in at least one pairwise  
1207 comparison between time-points, we divided the 16 152 expressed genes into 4 bins of equal  
1208 size according to their absolute level of expression (CPMs) (low expression, medium-low  
1209 expression, medium-high expression, and high expression). Then, we distributed the genes  
1210 undergoing differential AS in at least one pairwise comparison between time-points (355  
1211 genes) within these bins.

1212 To select genes that undergo differential AS in at least one pairwise comparison between  
1213 time-points but do not undergo changes in gene expression in the same time interval, we  
1214 used a confidence interval of 95% with  $MV \geq 10\%$  (differential AS) and  $|\log_2(FC)| > 1$  with  
1215  $FDR < 0.05$  (differential gene expression). After this cutoff we obtained 371 AS events  
1216 associated with 295 genes.

1217 Clustering of AS events into distinct sets based on their kinetics along lung development, was  
1218 performed by two methods: K-means and hierarchical clustering. K-means clustering was  
1219 performed using the *kmeans* function (amap package) in R using Spearman correlation as a  
1220 correlation method for each pair of AS events based on their PSI values at the different time-  
1221 points. The average silhouette width method was used to find the best number of clusters,  
1222 using the *fviz\_nbclust* function (factoextra package) in R. The AS events included in each  
1223 cluster are listed in **Table S5**. Hierarchical clustering was performed using *hclust* function  
1224 (stats package) in R using Spearman correlation as a correlation method for each pair of AS  
1225 events based on their PSI values at the different time-points and the complete-linkage  
1226 method as clustering method.

1227 Heatmaps of clustered AS events were represented in heatmaps using the heatmap.2  
1228 function in R. For the heatmap representation, logit (PSI) values were used and were scaled  
1229 by row by calculating row z-scores.

1230 For transcript-level analysis, transcripts isoform abundance in RNAseq datasets in transcripts  
1231 per million (TPM) was estimated using Kallisto (version 0.44.0)<sup>37</sup>. Vegfa *i5* isoform was  
1232 manually annotated in Kallisto index built with reference transcriptome before performing  
1233 the pseudo-alignment.

## 1234 **Pathway analysis**

1235 KEGG pathway analysis was carried out using DAVID v6.8<sup>63,64</sup>. KEGG terms with a modified  
1236 Fisher Exact p-value (EASE score) < 0.05 and FDR<0.1 were considered. The set of 16152 genes  
1237 we identified to be expressed in the lungs during the time-points analysed was used as control  
1238 background list.

### 1239 **RBPs motifs enrichment analysis**

1240 To identify potential RBPs regulators of the AS events detected during lung development, we  
1241 used Matt, a unix toolkit that searches for RBPs motifs in genomic sequences<sup>32</sup>. Briefly, we  
1242 used the *get\_vast* command to extract subsets of reported AS events generated by *Vast-tools*.  
1243 We considered only alternative splicing (AS) events in non-differentially expressed genes.  
1244 Then we filtered the table for intron retention events (IR) and exon skipping events of type S,  
1245 C1 and C2, with PSI values with a minimum quality flag of LOW. We defined categories for  
1246 each event (enhanced or silenced) based on the  $\Delta$ PSI values obtained from *Vast-tools*  
1247 (confidence interval of 95% with  $MV \geq 10\%$ ). A set of unregulated events was randomly  
1248 selected from the same genes with significant AS events to be used as control in the  
1249 enrichment analysis. Upstream and downstream sequences of each event were obtained with  
1250 Matt's *get\_seqs* command, comprising the 250 nucleotides flanking each splice site (150 nt  
1251 towards the intron and 100 nt towards the exon). Then, we performed an enrichment test  
1252 using Matt's *test\_cisbp\_enrich* function, which compares the positional density of motifs  
1253 from the database<sup>32</sup> in enhanced or silenced AS events against the background set of  
1254 unregulated exons or introns, predicting the number of hits between the two groups of  
1255 sequences associated with each rna binding protein (RBP) motif<sup>33</sup>. The Matt function  
1256 performs a permutation test to determine significant enrichment/depletion of RBP motifs (p-  
1257 value < 0.005). Finally, we used a custom python script based on the *regex* package to find  
1258 the number of events containing hits for each RBP motif, and plotted these values normalized

1259 by the total number of events of each type. In addition, we used Matt's function  
1260 `get_regexp_prof` to plot the positional distributions of motif hits across sequences.

1261 We selected RBPs that undergo changes in gene expression between E18.5 and P5  
1262 ( $|\log_2FC| > 1$  and  $FDR < 0.05$ ).

1263 To reinforce the results of the putative regulators we explored the CLIP-seq profiles of 356  
1264 RBPs in human cancer cells (HepG2 and K562), previously published and available in ENCODE  
1265 <sup>65</sup>. First, mouse AS events were converted to the respective human homologous exons using  
1266 VastDB <sup>28</sup>, and the equivalent genomic intervals (250nt flanking each splice site) were crossed  
1267 with the different CLIP-seq profiles for the enriched RBPs. Individual CLIP-seq profiles for each  
1268 loci were produced using Bedtools <sup>66</sup> and R tool <sup>67</sup>.

## 1269 **Statistical analysis**

1270 Statistical analysis was performed using GraphPad Prism 8. Measurements were taken from  
1271 distinct samples, and statistical details of experiments are reported in the figures and figure  
1272 legends. Sample size is reported in the figure legends. The biological replicate is defined as  
1273 the number of cells, images, animals, as stated in the figure legends. Comparisons between  
1274 two experimental groups were analysed with two-tailed unpaired t-test, while multiple  
1275 comparisons between more than two experimental groups were assessed with one-way  
1276 ANOVA with Tukey correction for multiple comparisons. Unless otherwise specified, data are  
1277 represented as mean  $\pm$  SD; n.s. -  $p > 0.05$ ; \* -  $p < 0.05$ , \*\* -  $p < 0.01$ , \*\*\* -  $p < 0.001$ , and \*\*\*\*  
1278 -  $p < 0.0001$ . We considered a result significant when  $p < 0.05$ .

A

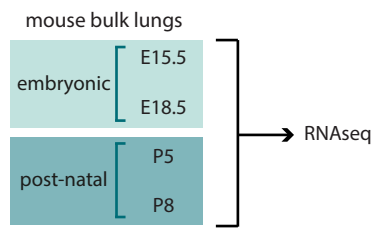

B

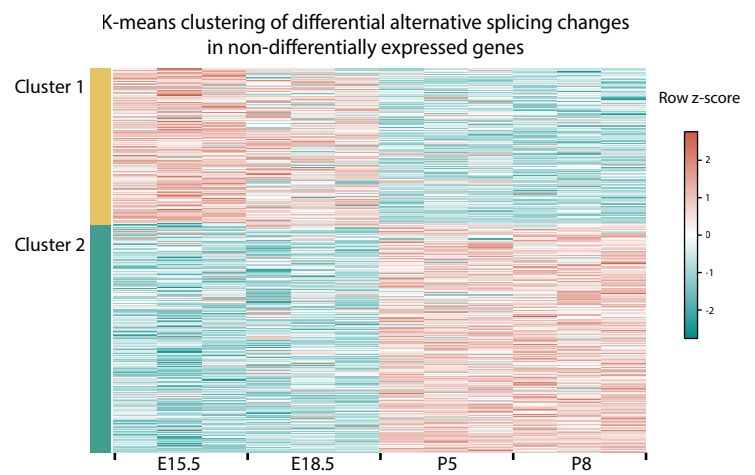

C

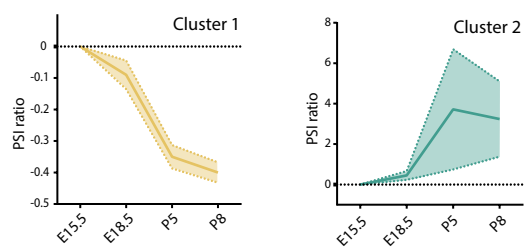

D

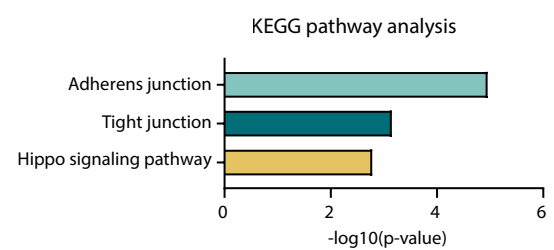

A

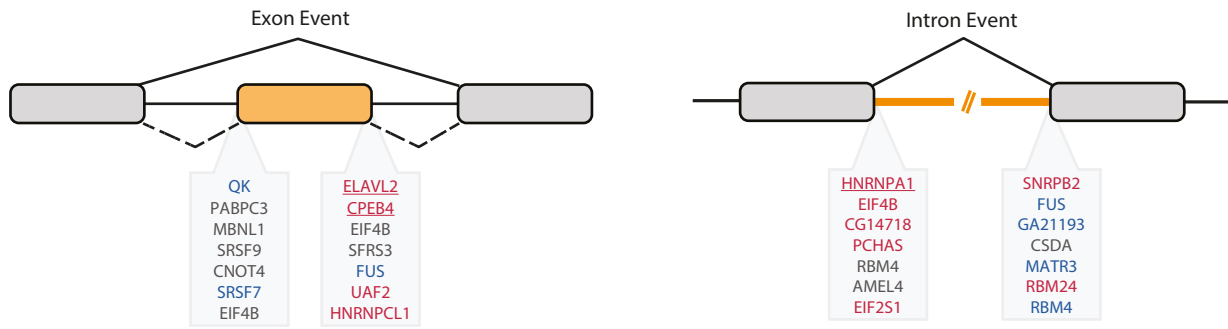

B

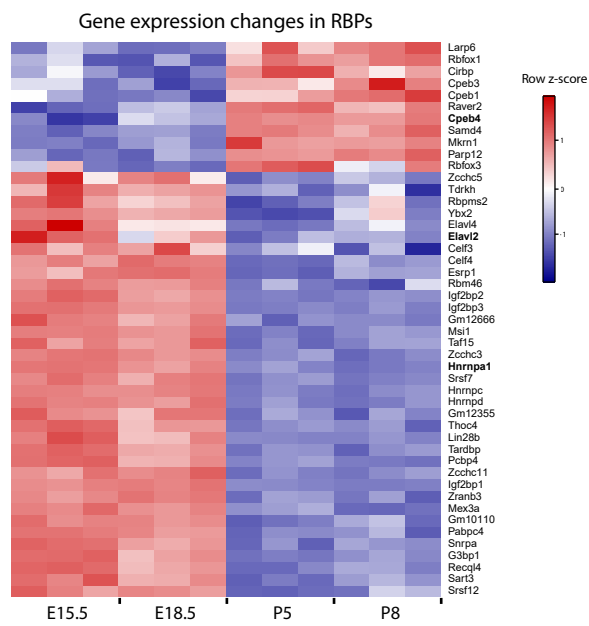

C

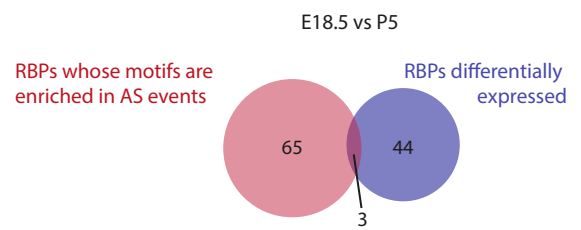

# Figure 3

A

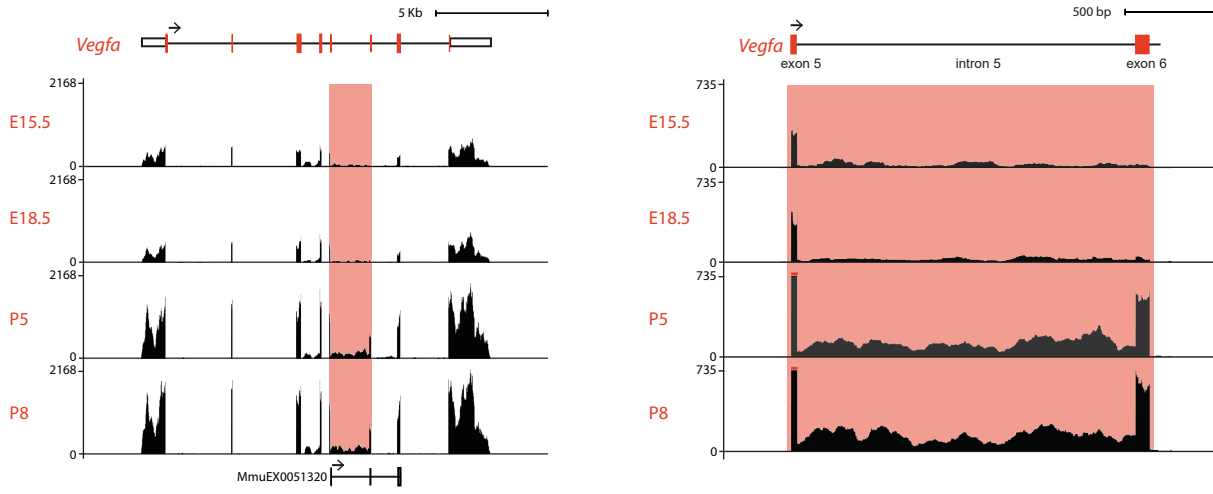

B

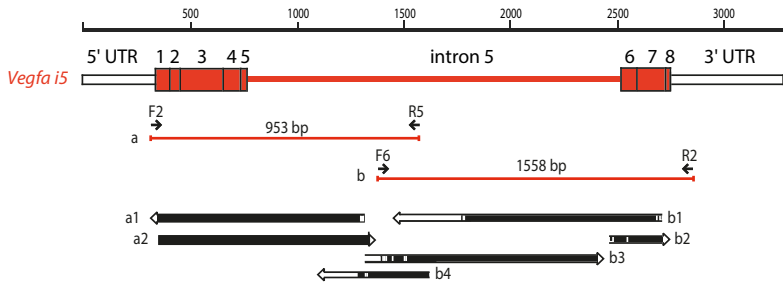

C

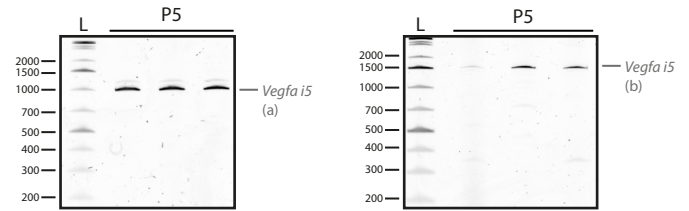



**Figure 4**

bioRxiv preprint doi: <https://doi.org/10.1101/2022.01.19.476886>; this version posted January 21, 2022. The copyright holder for this preprint (which was not certified by peer review) is the author/funder, who has granted bioRxiv a license to display the preprint in perpetuity. It is made available under aCC-BY 4.0 International license.

**A**

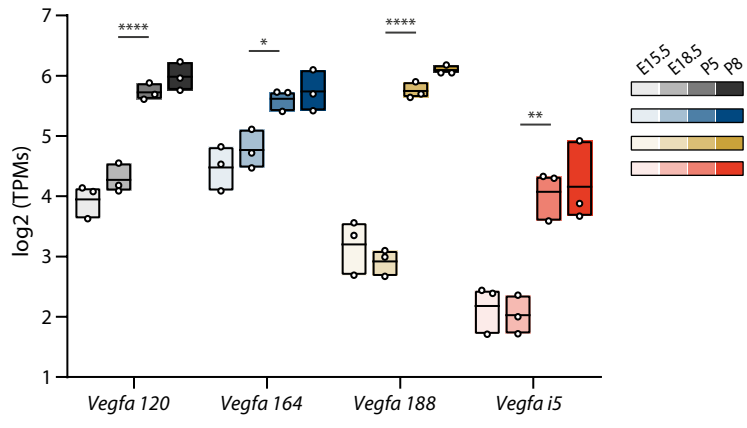

**B**

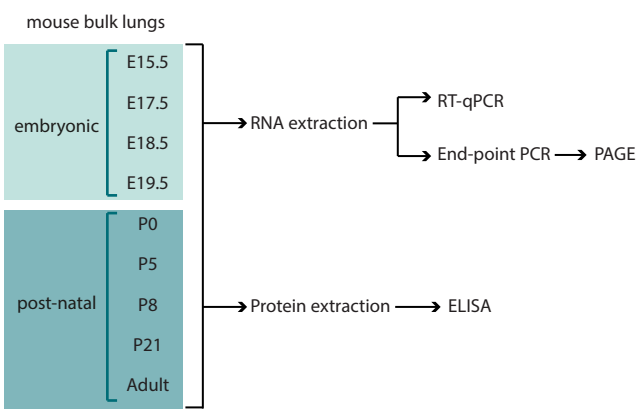

**C**

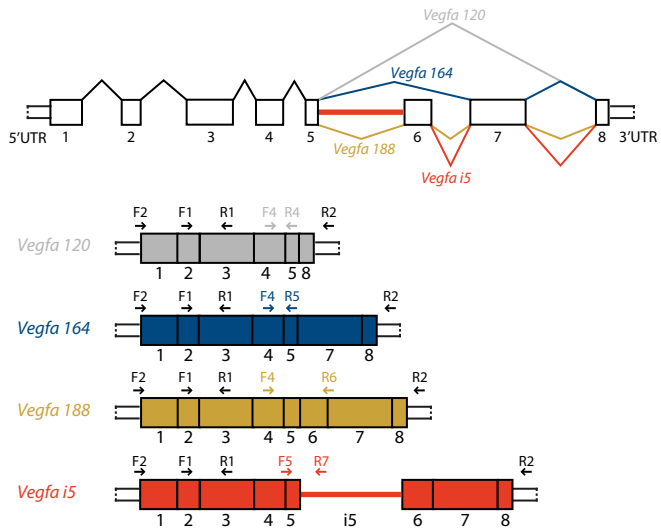

**D**

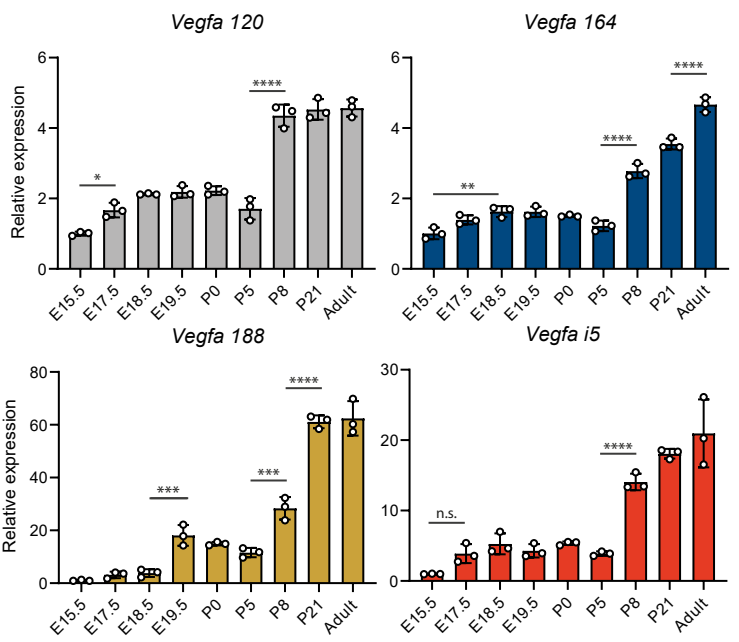

**E**

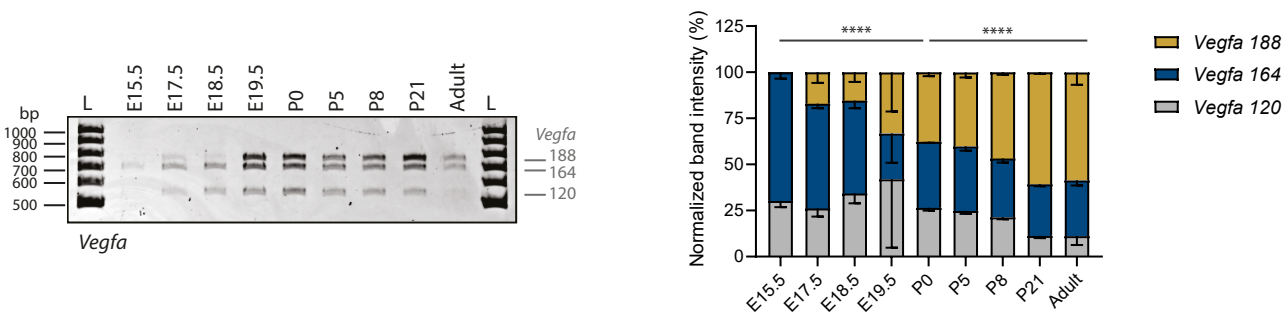

**A**

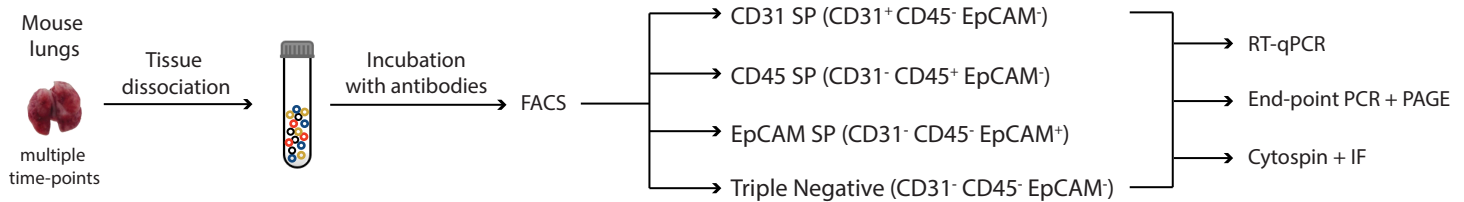

**B**

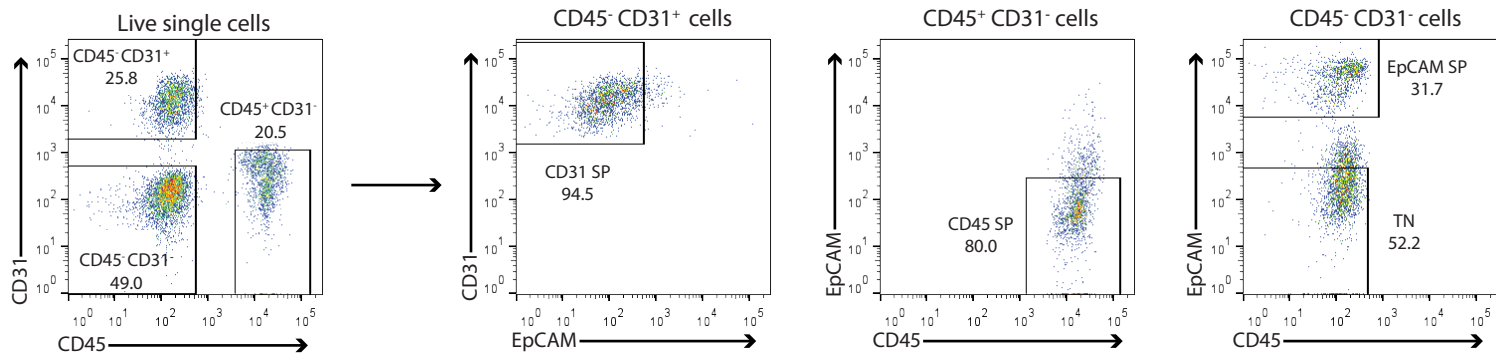

**C**

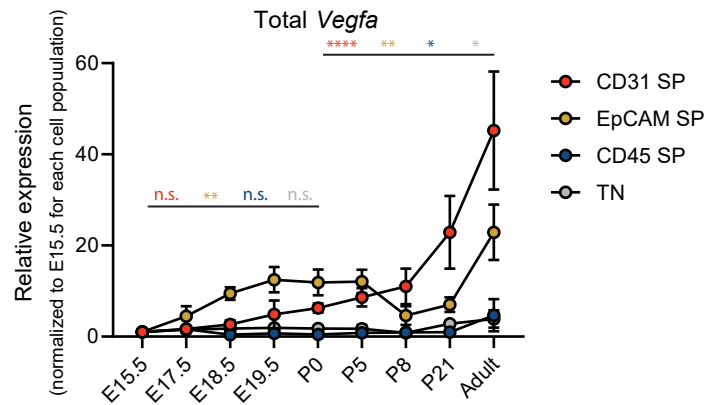

**D**

**CD31 SP**

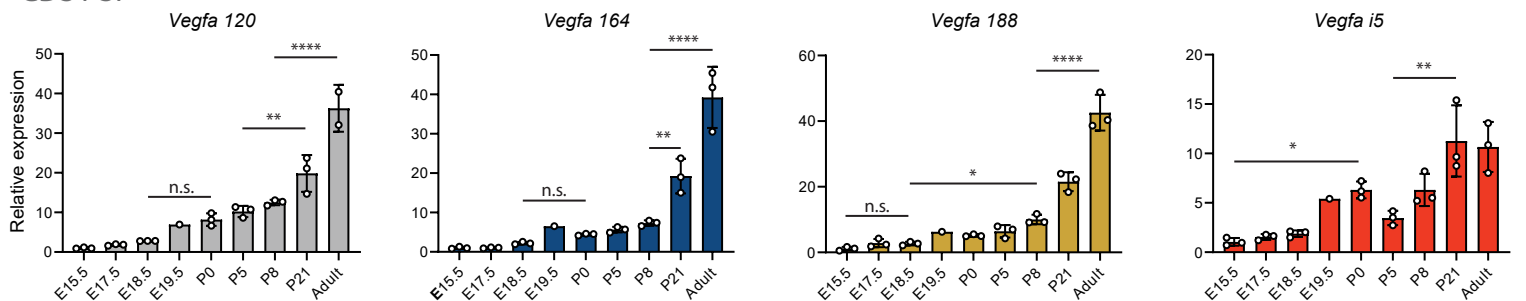

**E**

**EpCAM SP**

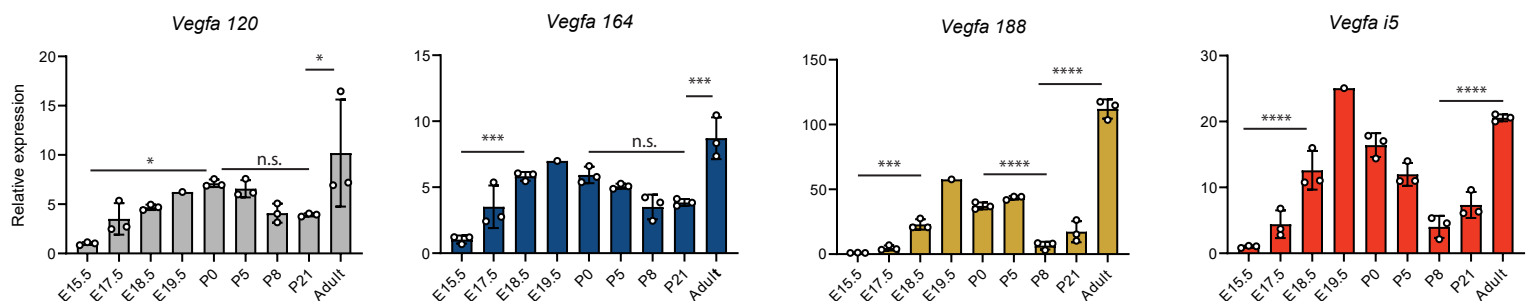

**F**

**CD31 SP**

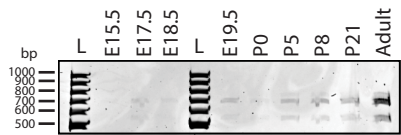

**EpCAM SP**

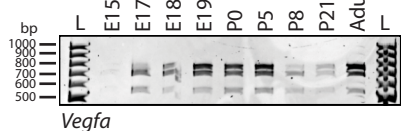

**G**

**CD31 SP**

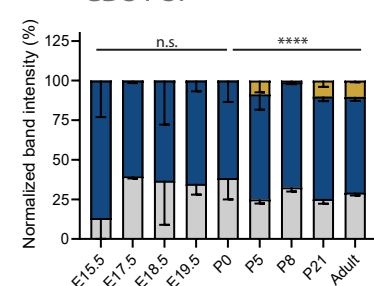

**EpCAM SP**

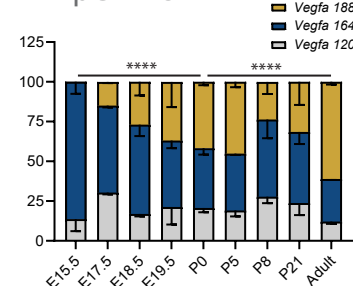

## Figure 6

A

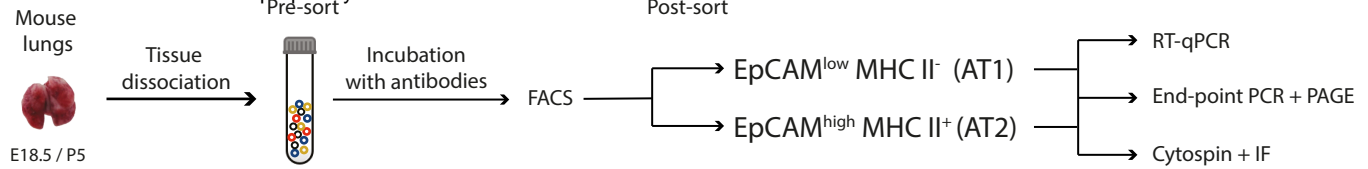

B

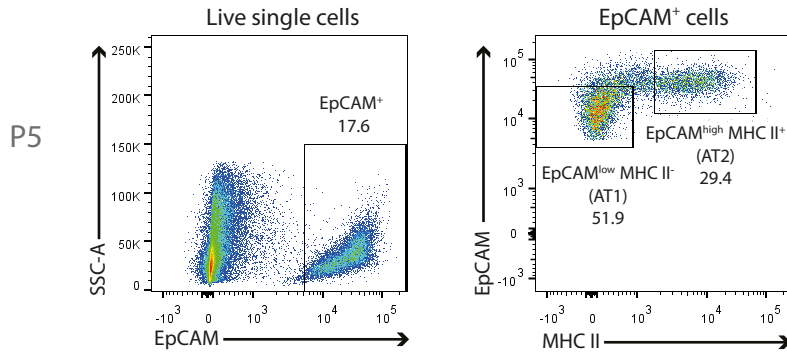

C

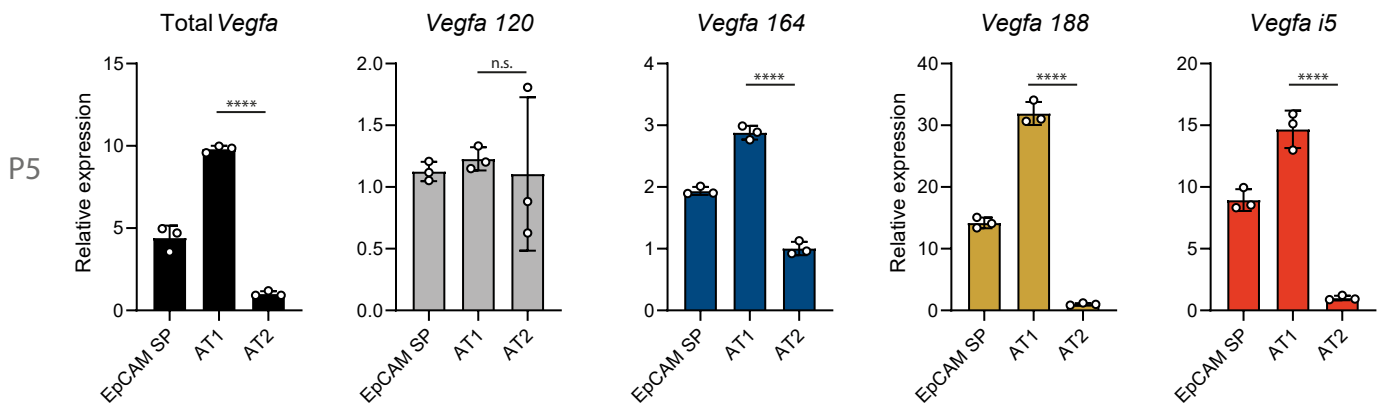

D

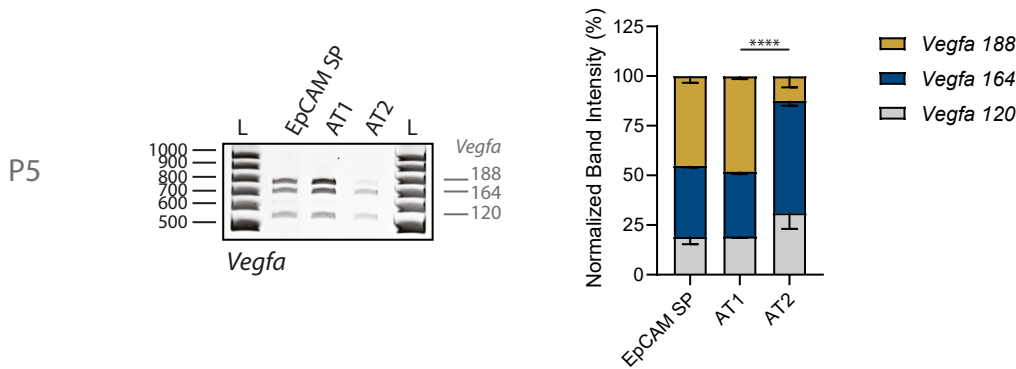

E

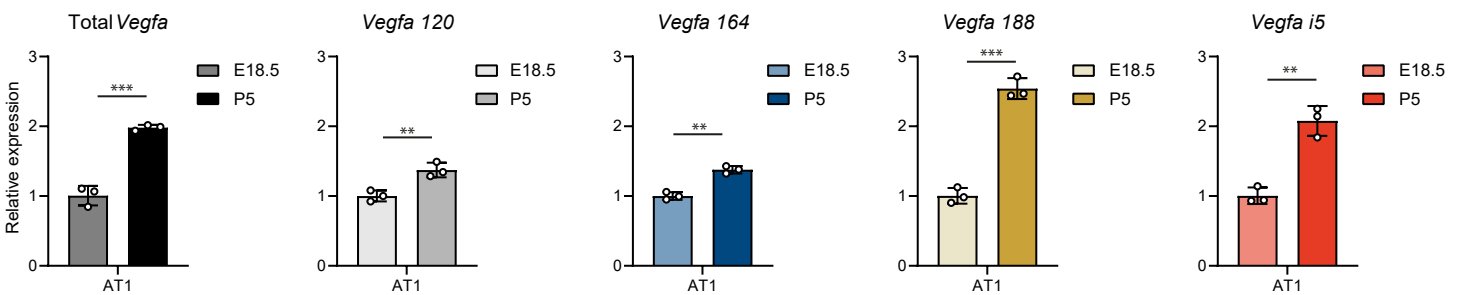

F

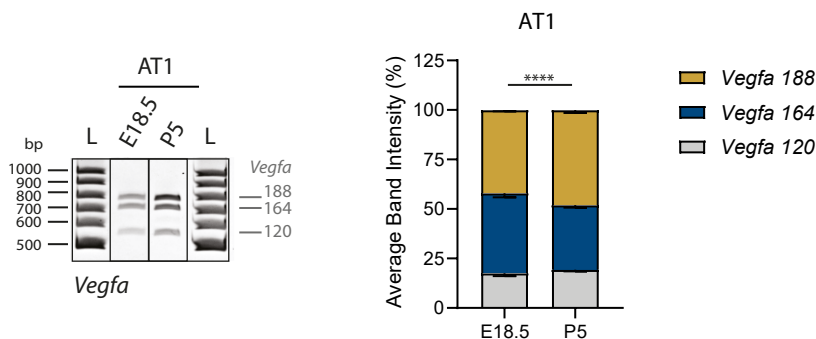

A

| Sample  | Library type | Total reads | % mapped |
|---------|--------------|-------------|----------|
| E15.5_1 | TruSeq PE100 | 66 723 173  | 79.7%    |
| E15.5_2 | TruSeq PE100 | 54 097 343  | 80.0%    |
| E15.5_3 | TruSeq PE100 | 54 353 280  | 79.0%    |
| E18.5_1 | TruSeq PE100 | 52 784 674  | 78.9%    |
| E18.5_2 | TruSeq PE100 | 55 721 510  | 81.8%    |
| E18.5_3 | TruSeq PE100 | 57 891 033  | 82.4%    |
| P5_1    | TruSeq PE100 | 66 902 914  | 81.9%    |
| P5_2    | TruSeq PE100 | 51 375 354  | 82.7%    |
| P5_3    | TruSeq PE100 | 64 899 788  | 81.7%    |
| P8_1    | TruSeq PE100 | 53 964 509  | 75.8%    |
| P8_2    | TruSeq PE100 | 66 355 179  | 79.3%    |
| P8_3    | TruSeq PE100 | 64 790 781  | 81.3%    |

B

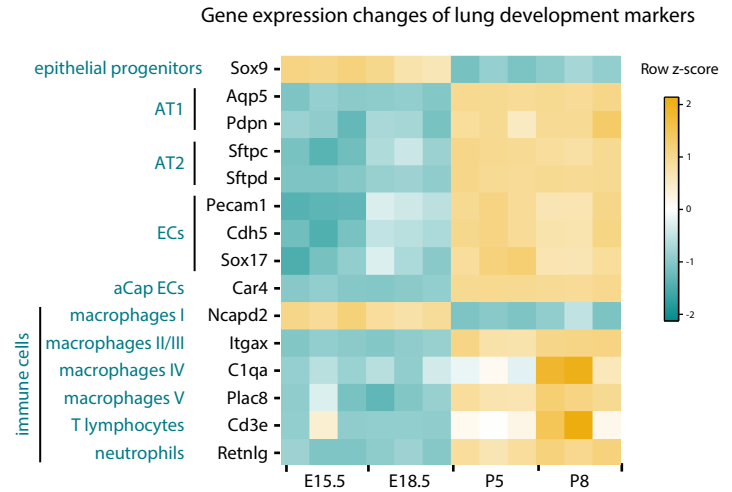

C

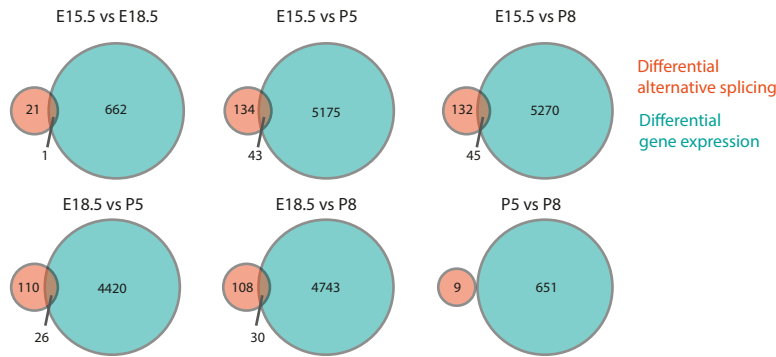

D

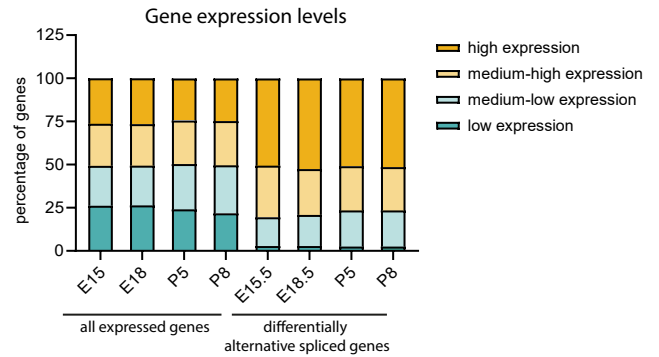

E

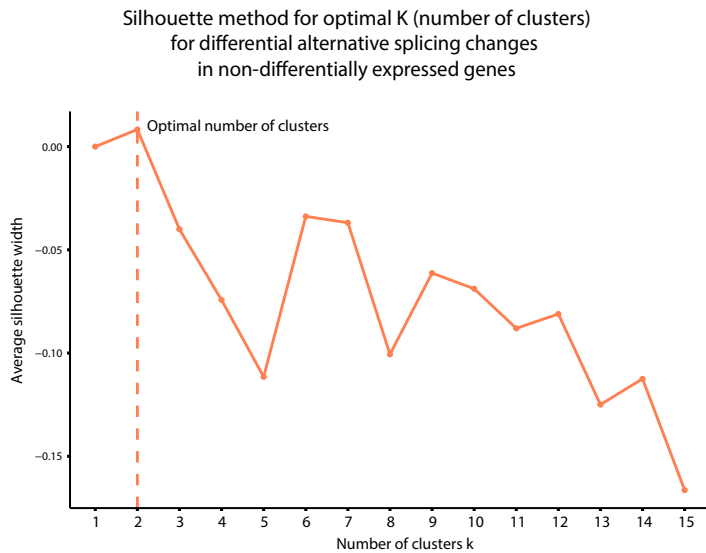

F

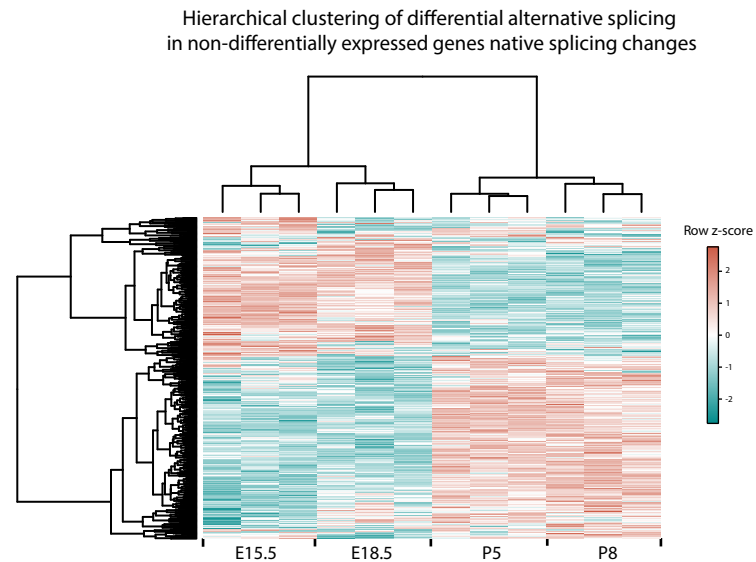

A

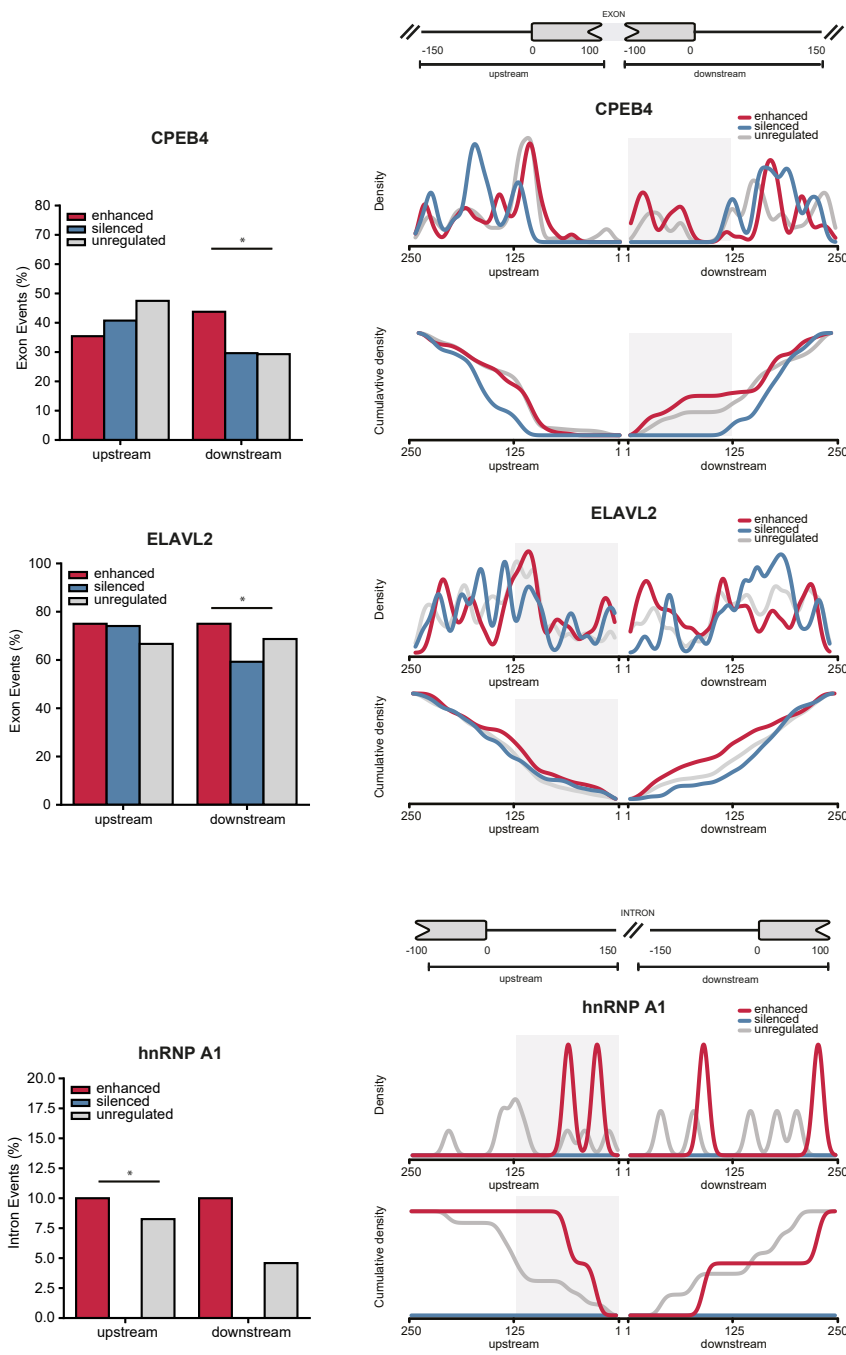

B

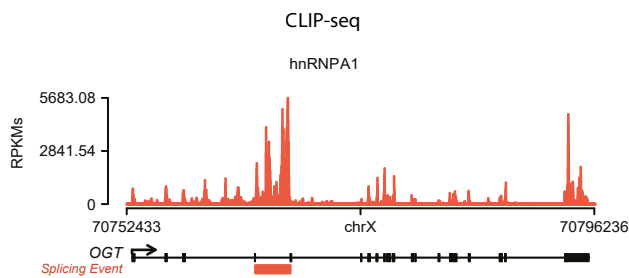

Figure S3

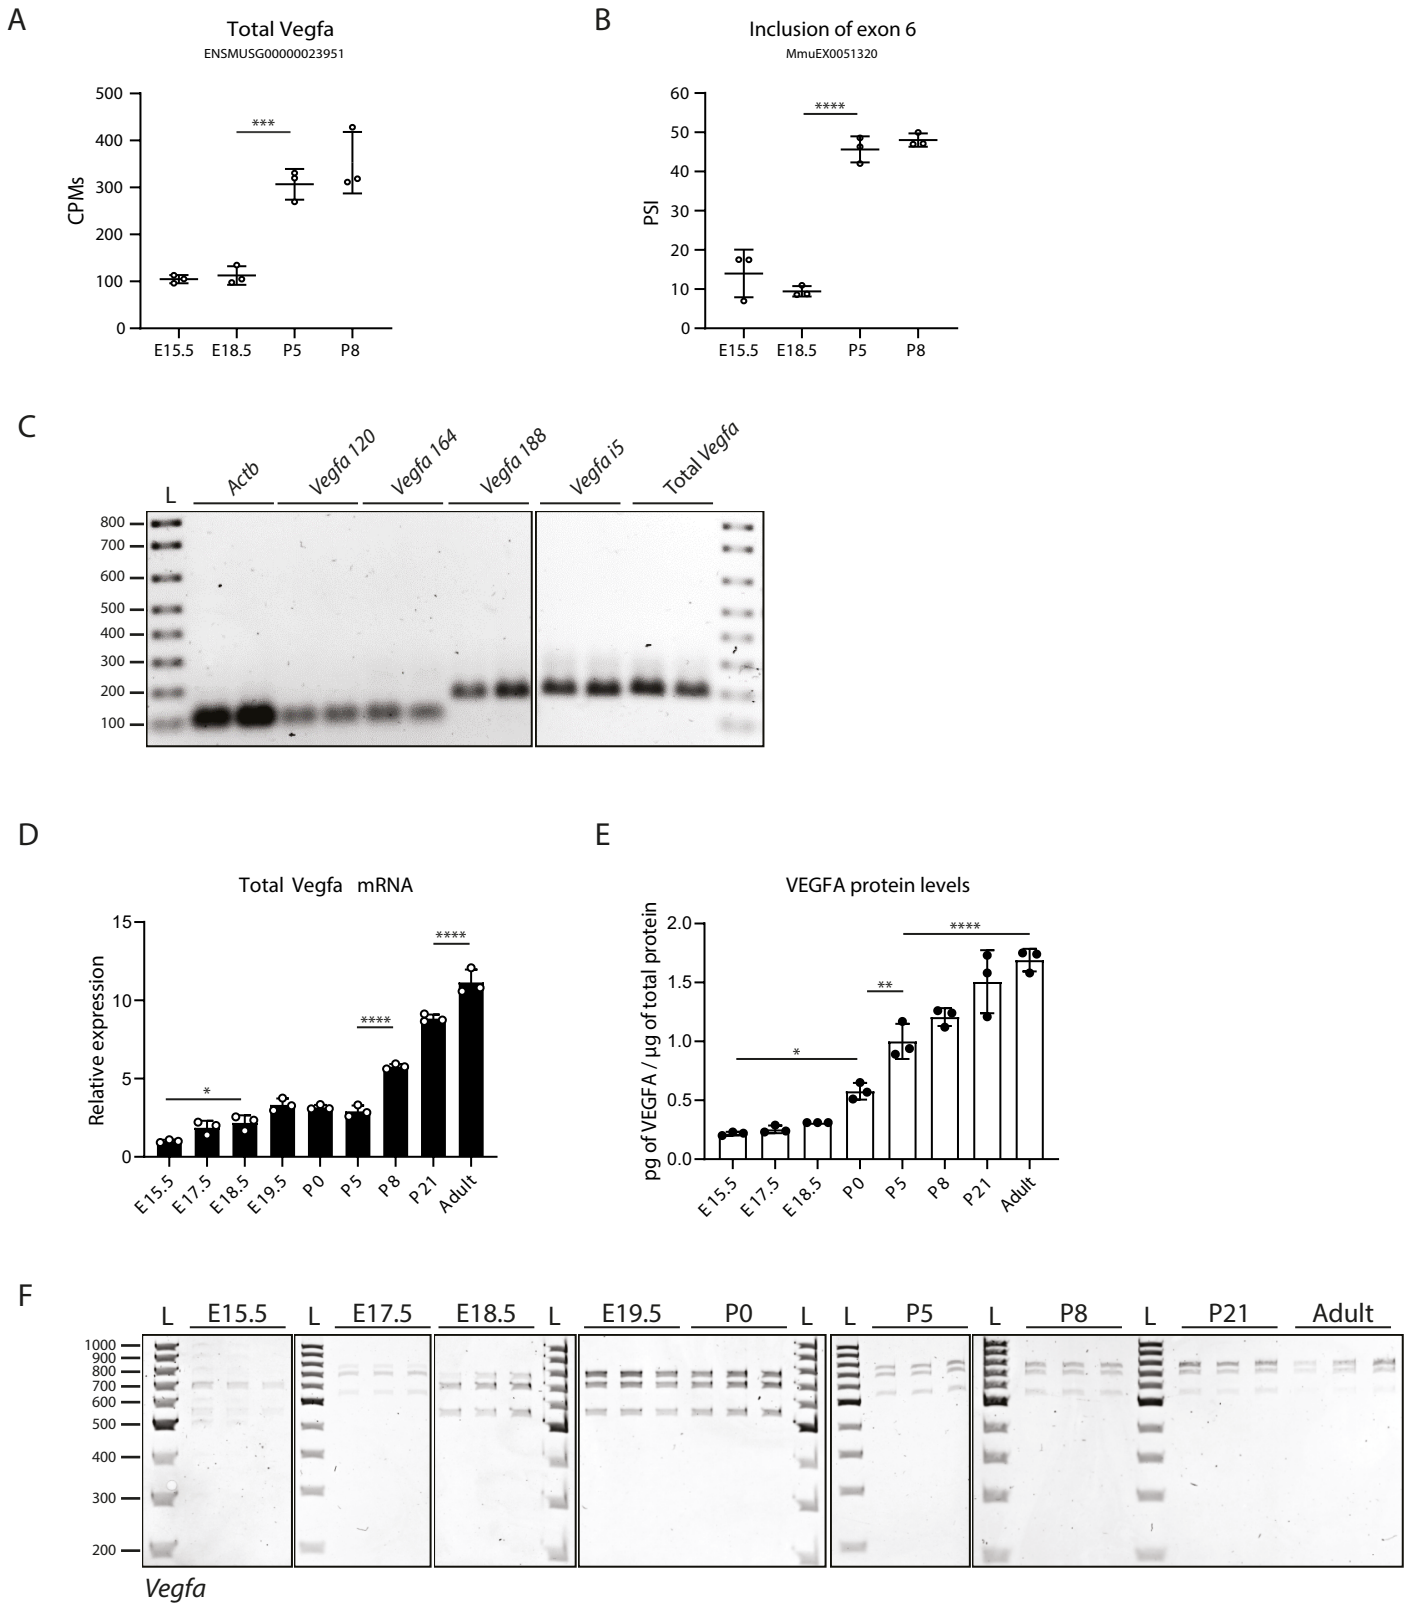

**Figure S4**

**A**

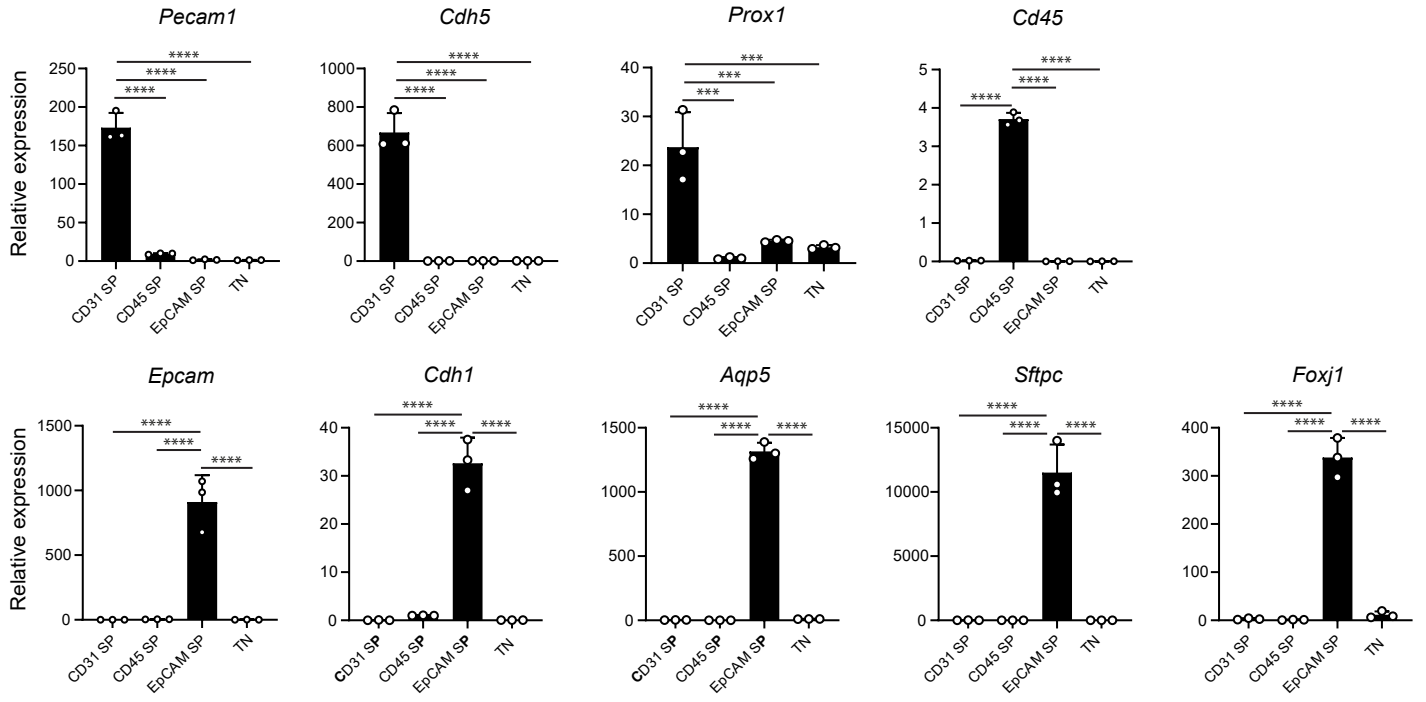

**B**

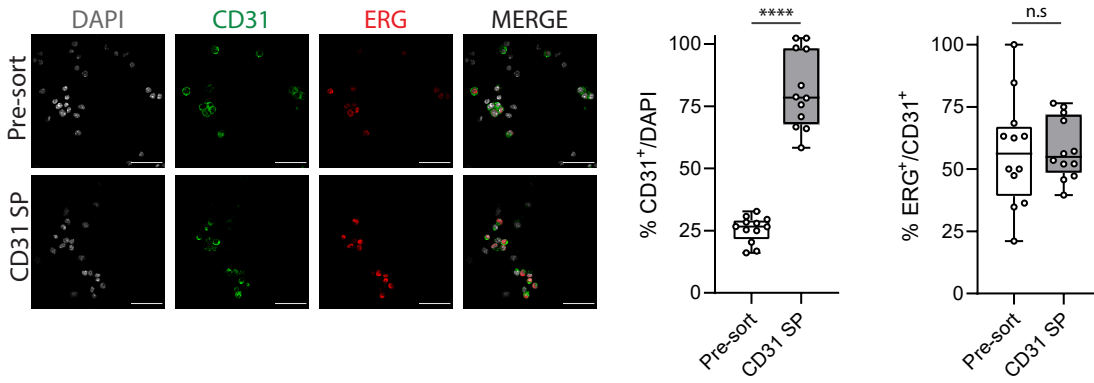

**C**

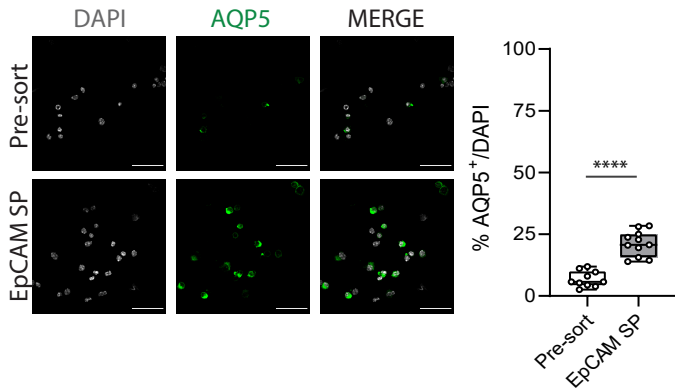

**D**

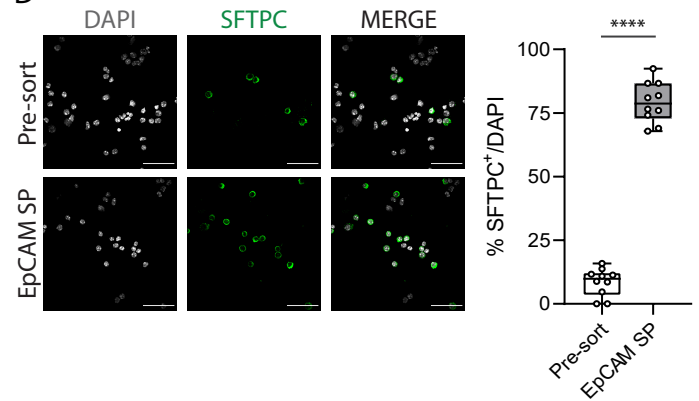

Figure S5

A

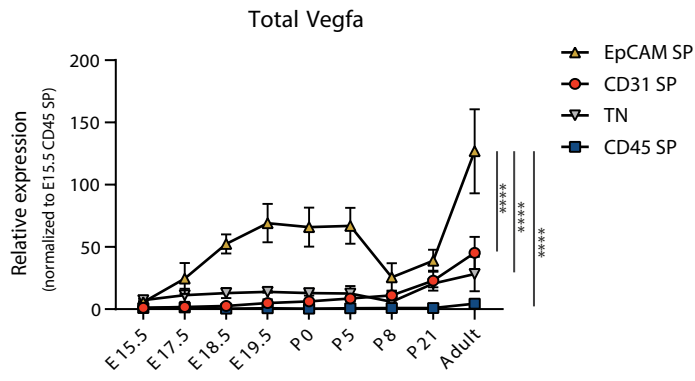

B

CD31 SP

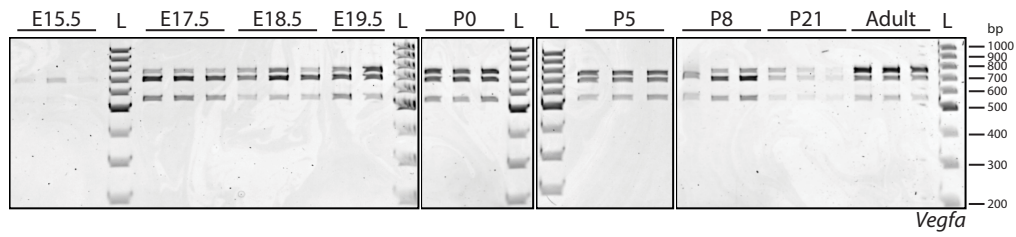

C

EpCAM SP

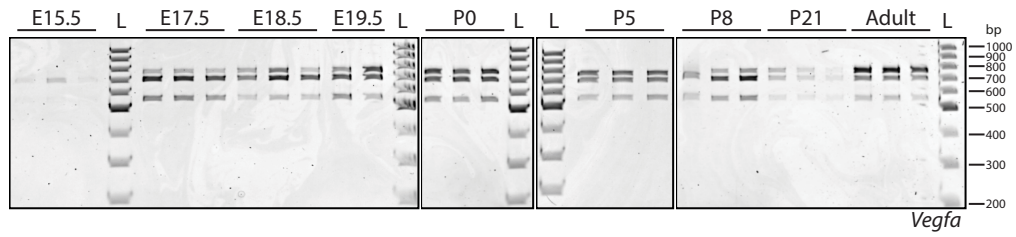



Figure S6

A

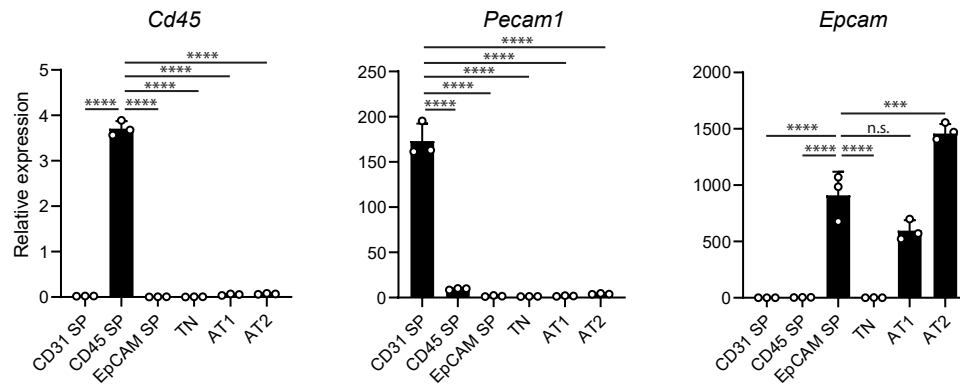

B

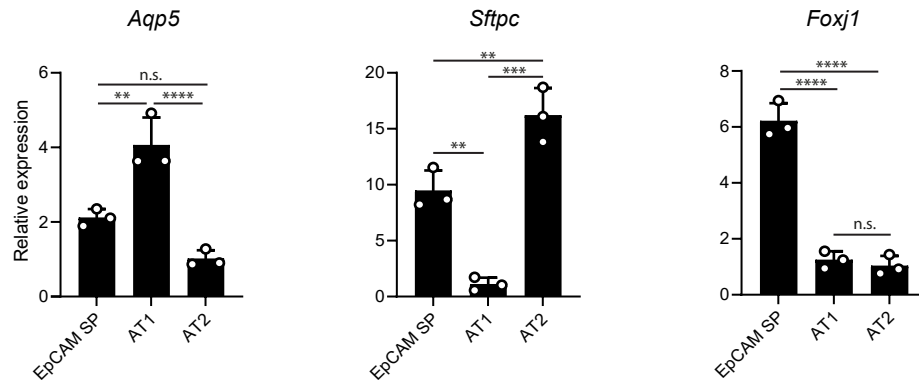

C

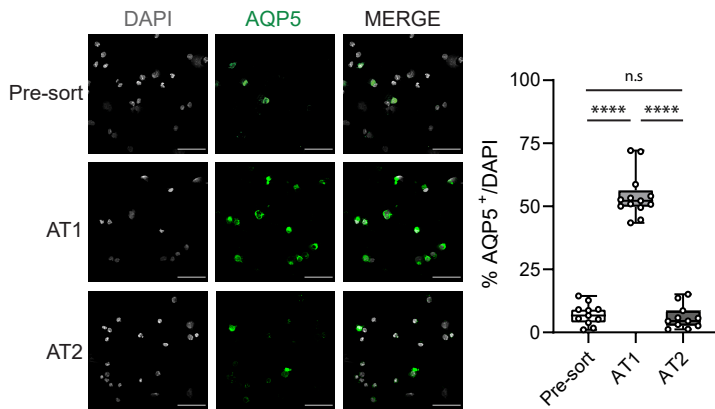

D

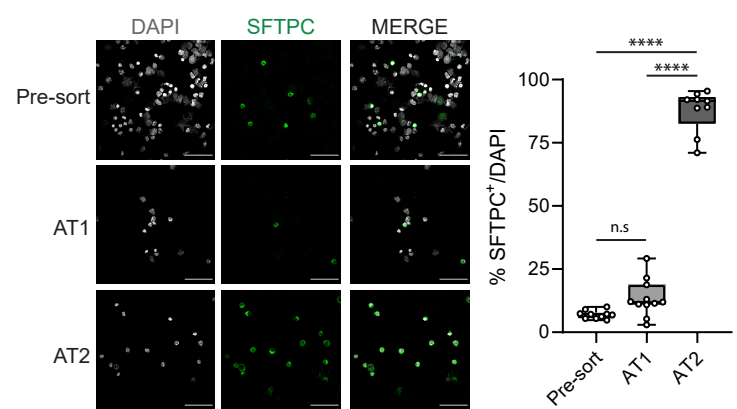

E

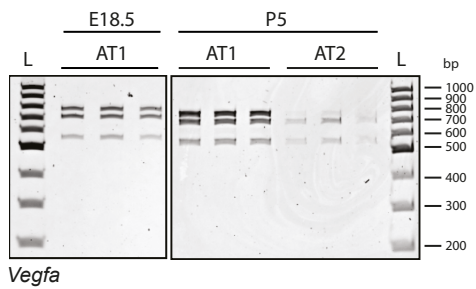

F

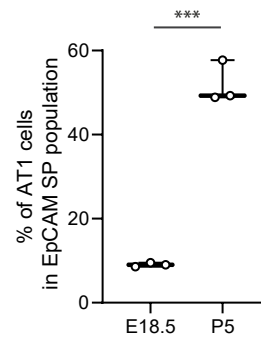

Source: https://www.biorxiv.org/content/10.1101/2022.01.19.476886.full.pdf
